# Supplementary material for: Neo-actinomycins A and B, natural actinomycins bearing the 5H-oxazolo[4,5-b]phenoxazine chromophore, from the marine-derived Streptomyces sp. IMB094
Source: PubMed Central journal article supplement (PMC5472614; doi:10.1038/s41598-017-03769-8), 2017-06-15
Supplement: 41598_2017_3769_MOESM1_ESM.pdf [file 41598_2017_3769_MOESM1_ESM.pdf]

**Neo-actinomycins A and B, natural actinomycins bearing the  
5*H*-oxazolo[4,5-*b*]phenoxazine chromophore, from the  
marine-derived *Streptomyces* sp. IMB094**

Qiang Wang, Yixuan Zhang, Mian Wang, Yi Tan, Xinxin Hu, Hongwei He, Chunling Xiao, Xuefu You, Yiguang Wang, and  
Maoluo Gan\*

Institute of Medicinal Biotechnology, Chinese Academy of Medical Sciences and Peking Union Medical College, Beijing  
100050, China

E-mail: [ganml@imb.pumc.edu.cn](mailto:ganml@imb.pumc.edu.cn); [ganml@hotmail.com](mailto:ganml@hotmail.com)

**Supplementary Information**

## Contents

|                                                                                                                                                                                                                                   |     |
|-----------------------------------------------------------------------------------------------------------------------------------------------------------------------------------------------------------------------------------|-----|
| <b>Table S1.</b> $^{13}\text{C}$ NMR Spectroscopic Data for Neo-actinomycin (1) and Actinomycin D (3) in $\text{DMSO-}d_6$ .....                                                                                                  | S3  |
| <b>Table S2.</b> $^1\text{H}$ NMR Spectroscopic Data for Neo-actinomycin (1) and Actinomycin D (3) in $\text{DMSO-}d_6$ .....                                                                                                     | S4  |
| <b>Table S3.</b> $^{13}\text{C}$ NMR Spectroscopic Data for Neo-actinomycin B (2).....                                                                                                                                            | S5  |
| <b>Table S4.</b> $^1\text{H}$ NMR Spectroscopic Data for Neo-actinomycin B (2).....                                                                                                                                               | S6  |
| <b>Figure S1.</b> Typical HPLC chromatogram at 400 nm and UV spectra for crude extracts of strain IMB094 cultures under normal fermentation conditions.....                                                                       | S7  |
| <b>Figure S2.</b> LC-MS chromatograms of (a) L-FDLA and (b) L/D-FDLA derivatives of the hydrolyzate of <b>1</b> .....                                                                                                             | S8  |
| <b>Table S5.</b> LC-MS Retention times ( $t_R$ , minute) of the derivatized amino acids from the hydrolysate of <b>1</b> .....                                                                                                    | S8  |
| <b>Figure S3.</b> Key HMBC and $^1\text{H-}^1\text{H}$ COSY correlations of <b>2</b> .....                                                                                                                                        | S9  |
| <b>Figure S4.</b> LC-MS analysis of neo-actinomycins in the cultures extracts of strain IMB094 in the feeding experiments.....                                                                                                    | S9  |
| <b>Figure S5.</b> LC-MS traces at 400 nm for (a) actinomycin D ( <b>3</b> ) and conversion of <b>3</b> to <b>1</b> with $\alpha$ -ketoglutaric acid in the fermentation M8 media (b), $\text{H}_2\text{O}$ (c), and MeOH (d)..... | S10 |
| <b>Figure S6.</b> LC-MS traces at 400 nm for (a) actinomycin D ( <b>3</b> ) and conversion of <b>3</b> to <b>2</b> with pyruvic acid in the fermentation M8 media (b), $\text{H}_2\text{O}$ (c), and MeOH (d) after 36 h.....     | S10 |
| <b>Table S6.</b> Conversion rates (%) of actinomycin D with $\alpha$ -ketoglutaric acid and pyruvic acid into neo-actinomycins A ( <b>1</b> ) and B ( <b>2</b> ) in MeOH and $\text{H}_2\text{O}$ under different pH.....         | S11 |
| <b>Figure S7.</b> LC-MS analysis of actinomycin analogs in the cultures extracts of strain IMB094 grown in the M8 and GGM media.....                                                                                              | S11 |
| <b>Figure S8.</b> LC-MS analysis of $\alpha$ -ketoglutarate and pyruvate in the cultures extracts of strain IMB094 and in the media prior to cultivation.....                                                                     | S12 |
| <b>Table S7.</b> Concentrations of compounds <b>1–4</b> , $\alpha$ -ketoglutarate, and pyruvate in the fermentation broth cultured in M8 and GGM media.....                                                                       | S12 |
| <b>Figure S9.</b> The CD and UV spectra of compounds <b>1–3</b> recorded in MeOH.....                                                                                                                                             | S13 |
| <b>Figure S10.</b> The (+)-HRESIMS spectrum of neo-actinomycin A ( <b>1</b> ).....                                                                                                                                                | S14 |
| <b>Figure S11.</b> The $^1\text{H}$ NMR spectrum of neo-actinomycin A ( <b>1</b> ) in $\text{DMSO-}d_6$ (600 MHz).....                                                                                                            | S15 |
| <b>Figure S12.</b> The $^{13}\text{C}$ NMR spectrum of neo-actinomycin A ( <b>1</b> ) in $\text{DMSO-}d_6$ (150 MHz).....                                                                                                         | S16 |
| <b>Figure S13.</b> The DEPT spectrum of neo-actinomycin A ( <b>1</b> ) in $\text{DMSO-}d_6$ (150 MHz).....                                                                                                                        | S17 |
| <b>Figure S14.</b> The COSY spectrum of neo-actinomycin A ( <b>1</b> ) in $\text{DMSO-}d_6$ (600 MHz).....                                                                                                                        | S18 |
| <b>Figure S15.</b> The HSQC spectrum of neo-actinomycin A ( <b>1</b> ) in $\text{DMSO-}d_6$ (600 MHz).....                                                                                                                        | S19 |
| <b>Figure S16.</b> The HMBC spectrum of neo-actinomycin A ( <b>1</b> ) in $\text{DMSO-}d_6$ (600 MHz).....                                                                                                                        | S20 |
| <b>Figure S17.</b> The ROESY spectrum of neo-actinomycin A ( <b>1</b> ) in $\text{DMSO-}d_6$ (600 MHz).....                                                                                                                       | S21 |
| <b>Figure S18.</b> The (+)-HRESIMS spectrum of neo-actinomycin B ( <b>2</b> ).....                                                                                                                                                | S22 |
| <b>Figure S19.</b> The $^1\text{H}$ NMR spectrum of neo-actinomycin B ( <b>2</b> ) in $\text{DMSO-}d_6$ (600 MHz).....                                                                                                            | S23 |
| <b>Figure S20.</b> The $^{13}\text{C}$ NMR spectrum of neo-actinomycin B ( <b>2</b> ) in $\text{DMSO-}d_6$ (150 MHz).....                                                                                                         | S24 |
| <b>Figure S21.</b> The $^1\text{H}$ NMR spectrum of neo-actinomycin B ( <b>2</b> ) in $\text{MeOH-}d_4$ (600 MHz).....                                                                                                            | S25 |
| <b>Figure S22.</b> The $^{13}\text{C}$ NMR spectrum of neo-actinomycin B ( <b>2</b> ) in $\text{MeOH-}d_4$ (150 MHz).....                                                                                                         | S26 |
| <b>Figure S23.</b> The DEPT spectrum of neo-actinomycin B ( <b>2</b> ) in $\text{MeOH-}d_4$ (150 MHz).....                                                                                                                        | S27 |
| <b>Figure S24.</b> The COSY spectrum of neo-actinomycin B ( <b>2</b> ) in $\text{MeOH-}d_4$ (600 MHz).....                                                                                                                        | S28 |
| <b>Figure S25.</b> The TOCSY spectrum of neo-actinomycin B ( <b>2</b> ) in $\text{MeOH-}d_4$ (600 MHz).....                                                                                                                       | S29 |
| <b>Figure S26.</b> The HSQC spectrum of neo-actinomycin B ( <b>2</b> ) in $\text{MeOH-}d_4$ (600 MHz).....                                                                                                                        | S30 |
| <b>Figure S27.</b> The HMBC spectrum of neo-actinomycin B ( <b>2</b> ) in $\text{MeOH-}d_4$ (600 MHz).....                                                                                                                        | S31 |
| <b>Figure S28.</b> The ROESY spectrum of neo-actinomycin B ( <b>2</b> ) in $\text{MeOH-}d_4$ (600 MHz).....                                                                                                                       | S32 |

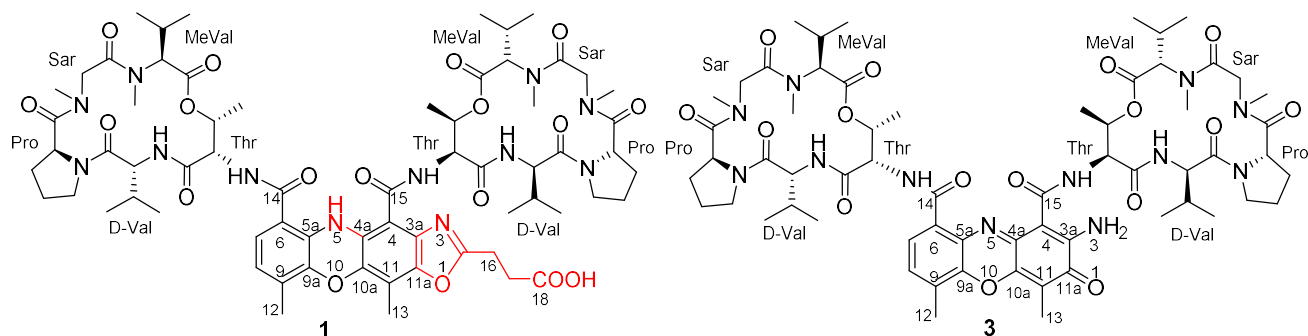

**Table S1.**  $^{13}\text{C}$  NMR Spectroscopic Data for Neo-actinomycin (**1**) and Actinomycin D (**3**) in  $\text{DMSO-}d_6^a$

| no.         | pentapeptidolactone ( $\alpha$ -ring) |       |                | no.     | pentapeptidolactone ( $\beta$ -ring) |       |                |
|-------------|---------------------------------------|-------|----------------|---------|--------------------------------------|-------|----------------|
|             | 1                                     | 3     | $\Delta\delta$ |         | 1                                    | 3     | $\Delta\delta$ |
| Thr 1       | 169.2                                 | 168.2 | 1.0            | Thr 1   | 169.4                                | 168.3 | 1.1            |
| 2           | 53.9                                  | 54.4  | -0.5           | 2       | 54.9                                 | 54.4  | 0.5            |
| 3           | 72.3                                  | 73.5  | -1.2           | 3       | 71.9                                 | 73.5  | -1.6           |
| 4           | 16.3                                  | 16.9  | -0.6           | 4       | 16.7                                 | 16.9  | -0.2           |
| Val 1       | 170.6                                 | 172.7 | -2.1           | Val 1   | 170.7                                | 172.7 | -2.0           |
| 2           | 57.4                                  | 57.6  | -0.2           | 2       | 57.4                                 | 57.7  | -0.3           |
| 3           | 30.1                                  | 30.8  | -0.7           | 3       | 30.2                                 | 30.8  | -0.6           |
| 4           | 18.6                                  | 18.6  | 0.0            | 4       | 18.6                                 | 18.6  | 0.0            |
| 5           | 19.1                                  | 19.1  | 0.0            | 5       | 19.1                                 | 19.1  | 0.0            |
| Pro 1       | 173.0                                 | 172.3 | 0.7            | Pro 1   | 173.0                                | 172.3 | 0.7            |
| 2           | 54.8                                  | 55.9  | -1.1           | 2       | 54.8                                 | 55.9  | -1.1           |
| 3           | 31.1                                  | 30.5  | 0.6            | 3       | 31.2                                 | 30.5  | 0.7            |
| 4           | 22.7                                  | 22.5  | 0.2            | 4       | 22.8                                 | 22.5  | 0.3            |
| 5           | 46.4                                  | 46.8  | -0.4           | 5       | 46.4                                 | 46.8  | -0.4           |
| Sar 1       | 167.0                                 | 166.7 | 0.3            | Sar 1   | 167.1                                | 166.9 | 0.2            |
| 2           | 51.2                                  | 50.9  | 0.3            | 2       | 51.2                                 | 50.9  | 0.3            |
| NMe         | 34.4                                  | 34.3  | 0.1            | NMe     | 34.4                                 | 34.3  | 0.1            |
| MeVal 1     | 168.1                                 | 168.1 | 0.0            | MeVal 1 | 168.2                                | 168.1 | 0.1            |
| 2           | 69.5                                  | 69.3  | 0.2            | 2       | 69.6                                 | 69.4  | 0.2            |
| 3           | 26.5                                  | 26.7  | -0.2           | 3       | 26.5                                 | 26.7  | -0.2           |
| 4           | 21.0                                  | 21.1  | -0.1           | 4       | 21.1                                 | 21.1  | 0.0            |
| 5           | 18.8                                  | 18.6  | 0.2            | 5       | 18.8                                 | 18.6  | 0.2            |
| NMe         | 38.6                                  | 38.5  | 0.1            | NMe     | 38.8                                 | 38.5  | 0.3            |
| chromophore |                                       |       |                |         |                                      |       |                |
| 2           | 165.8                                 |       |                | 10a     | 139.5                                | 144.7 | -5.2           |
| 3a          | 132.9                                 | 146.5 | -13.6          | 11      | 111.8                                | 111.9 | -0.1           |
| 4           | 100.2                                 | 102.2 | -2.0           | 11a     | 143.5                                | 178.7 | -35.2          |
| 4a          | 132.0                                 | 145.5 | -13.5          | 12      | 14.8                                 | 14.6  | 0.2            |
| 5a          | 131.3                                 | 129.3 | 2.0            | 13      | 8.9                                  | 7.6   | 1.3            |
| 6           | 113.4                                 | 131.6 | -18.2          | 14      | 166.6                                | 166.1 | 0.5            |
| 7           | 122.0                                 | 125.1 | -3.1           | 15      | 165.4                                | 165.9 | -0.5           |
| 8           | 122.0                                 | 129.6 | -7.6           | 16      | 23.3                                 |       |                |
| 9           | 127.5                                 | 127.0 | 0.5            | 17      | 30.3                                 |       |                |
| 9a          | 140.7                                 | 140.0 | 0.7            | 18      | 173.1                                |       |                |

<sup>a</sup>  $^{13}\text{C}$  NMR data were recorded at 150 MHz. For comparison of NMR data of **1** and **3**, the atom numbers in **3** are labelled as the same as

**1**.

**Table S2. <sup>1</sup>H NMR Spectroscopic Data for Neo-actinomycin (1) and Actinomycin D (3) in DMSO-*d*<sub>6</sub><sup>a</sup>**

| pentapeptidolactone ( $\alpha$ -ring) |                                |                                | pentapeptidolactone ( $\beta$ -ring) |                                |                                |
|---------------------------------------|--------------------------------|--------------------------------|--------------------------------------|--------------------------------|--------------------------------|
| no.                                   | 1                              | 3                              | no.                                  | 1                              | 3                              |
| Thr 2                                 | 4.97, dd (9.0, 2.4)            | 4.50, dd (7.2, 2.4)            | Thr 2                                | 4.84, dd (8.4, 2.4)            | 4.50, dd (7.2, 2.4)            |
| 3                                     | 5.14, qd (6.0, 2.4)            | 5.07, m                        | 3                                    | 5.24, qd (6.0, 2.4)            | 5.07, m                        |
| 4                                     | 1.17, d (6.0)                  | 1.18, d (6.6)                  | 4                                    | 1.20, d (6.0)                  | 1.18, d (6.6)                  |
| NH                                    | 7.25, d (9.0)                  |                                | NH                                   | 9.66, d (8.4)                  |                                |
| Val 2                                 | 3.50, m                        | 3.55, m                        | Val 2                                | 3.49, m                        | 3.55, m                        |
| 3                                     | 1.88, m                        | 1.96, m                        | 3                                    | 1.88, m                        | 1.96, m                        |
| 4                                     | 0.92, d (6.6)                  | 0.91, d (6.0)                  | 4                                    | 0.94, d (6.6)                  | 0.91, d (6.0)                  |
| 5                                     | 0.69, d (7.2)                  | 0.71, d (6.6)                  | 5                                    | 0.70, (7.2)                    | 0.71, d (6.6)                  |
| NH                                    | 8.42, d (6.0)                  |                                | NH                                   | 8.29, d (5.4)                  |                                |
| Pro 2                                 | 6.24, dd (9.0, 3.0)            | 6.06, brd (10.2)               | Pro 2                                | 6.21, dd (9.0, 3.0)            | 6.05, brd (10.2)               |
| 3                                     | 2.10, m; 1.74, m               | 2.43, m; 1.73, m               | 3                                    | 2.10, m, 1.74, m               | 2.43, m; 1.73, m               |
| 4                                     | 1.91, m; 1.67, m               | 2.00, m; 1.96, m               | 4                                    | 1.91, m, 1.67, m               | 2.00, m; 1.96, m               |
| 5                                     | 3.49, m; 3.27, m               | 3.81, m; 3.50, m               | 5                                    | 3.50, m, 3.27, m               | 3.81, m; 3.50, m               |
| Sar 2                                 | 4.80, d (18.0); 4.08, d (18.0) | 4.56, d (18.0); 4.04, d (18.0) | Sar 2                                | 4.78, d (18.0); 4.08, d (18.0) | 4.56, d (18.0); 4.04, d (18.0) |
| NMe                                   | 2.75, s                        | 2.72, s                        | NMe                                  | 2.75, s                        | 2.72, s                        |
| MeVal 2                               | 3.23, d (9.6)                  | 3.13, d (9.6)                  | MeVal 2                              | 3.23, d (9.6)                  | 3.07, d (9.6)                  |
| 3                                     | 2.54, m                        | 2.46, m                        | 3                                    | 2.54, m                        | 2.46, m                        |
| 4                                     | 0.97, d (6.6)                  | 0.97, d (6.6)                  | 4                                    | 0.98, d (6.6)                  | 0.97, d (6.6)                  |
| 5                                     | 0.79, d (6.6)                  | 0.74, d (6.6)                  | 5                                    | 0.80, d (6.6)                  | 0.74, d (6.6)                  |
| NMe                                   | 3.19, s                        | 2.94, s                        | NMe                                  | 3.19, s                        | 2.92, s                        |
| chromophore                           |                                |                                |                                      |                                |                                |
| 5                                     | 11.74, s                       |                                | 13                                   | 2.27, s                        | 2.50, s                        |
| 7                                     | 7.11, d (8.4)                  | 7.41, d (7.8)                  | 16                                   | 3.17, m                        |                                |
| 8                                     | 6.62, d (8.4)                  | 7.41, d (7.8)                  | 17                                   | 2.89, m                        |                                |
| 12                                    | 2.13, s                        | 2.14, s                        |                                      |                                |                                |

<sup>a</sup> <sup>1</sup>H NMR data were recorded at 600 MHz. For comparison of NMR data of **1** and **3**, the atom numbers in **3** are labelled as the same as **1**.

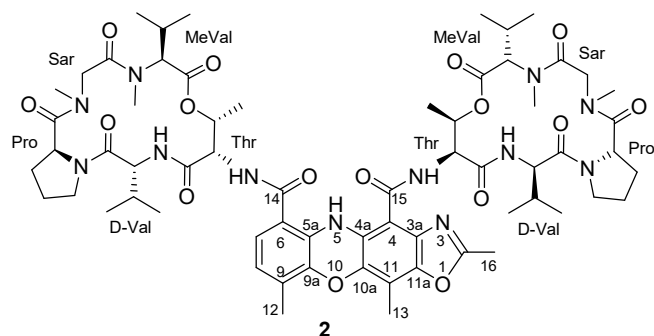

**Table S3.**  $^{13}\text{C}$  NMR Spectroscopic Data for Neo-actinomycin B (2)<sup>a</sup>

| no.         | pentapeptidolactone ( $\alpha$ -ring) |                             | no.     | pentapeptidolactone ( $\beta$ -ring) |                             |
|-------------|---------------------------------------|-----------------------------|---------|--------------------------------------|-----------------------------|
|             | DMSO- <i>d</i> <sub>6</sub>           | MeOH- <i>d</i> <sub>4</sub> |         | DMSO- <i>d</i> <sub>6</sub>          | MeOH- <i>d</i> <sub>4</sub> |
| Thr 1       | 169.2, C                              | 171.3, C                    | Thr 1   | 169.4, C                             | 171.6, C                    |
| 2           | 54.0, CH                              | 55.8, CH                    | 2       | 54.8, CH                             | 56.2, CH                    |
| 3           | 72.2, CH                              | 74.6, CH                    | 3       | 71.9, CH                             | 74.0, CH                    |
| 4           | 16.4, CH <sub>3</sub>                 | 17.3, CH <sub>3</sub>       | 4       | 16.8, CH <sub>3</sub>                | 17.2, CH <sub>3</sub>       |
| Val 1       | 170.6, C                              | 173.8, C                    | Val 1   | 170.8, C                             | 173.9, C                    |
| 2           | 57.4, CH                              | 59.6, CH                    | 2       | 57.4, CH                             | 59.5, CH                    |
| 3           | 30.1, CH                              | 32.0, CH                    | 3       | 30.2, CH                             | 32.0, CH                    |
| 4           | 18.7, CH <sub>3</sub>                 | 19.8, CH <sub>3</sub>       | 4       | 18.6, CH <sub>3</sub>                | 19.8, CH <sub>3</sub>       |
| 5           | 19.1, CH <sub>3</sub>                 | 19.5, CH <sub>3</sub>       | 5       | 19.1, CH <sub>3</sub>                | 19.5, CH <sub>3</sub>       |
| Pro 1       | 173.0, C                              | 175.5, C                    | Pro 1   | 173.1, C                             | 175.7, C                    |
| 2           | 54.7, CH                              | 57.6, CH                    | 2       | 54.4, CH                             | 57.4, CH                    |
| 3           | 31.3, CH <sub>2</sub>                 | 32.5, CH <sub>2</sub>       | 3       | 31.2, CH <sub>2</sub>                | 32.5, CH <sub>2</sub>       |
| 4           | 22.8, CH <sub>2</sub>                 | 24.1, CH <sub>2</sub>       | 4       | 22.8, CH <sub>2</sub>                | 24.1, CH <sub>2</sub>       |
| 5           | 46.4, CH <sub>2</sub>                 | 48.4, CH <sub>2</sub>       | 5       | 46.4, CH <sub>2</sub>                | 48.3, CH <sub>2</sub>       |
| Sar 1       | 167.2, C                              | 168.7, C                    | Sar 1   | 167.0, C                             | 168.6, C                    |
| 2           | 51.3, CH <sub>2</sub>                 | 53.0, CH <sub>2</sub>       | 2       | 51.1, CH <sub>2</sub>                | 52.9, CH <sub>2</sub>       |
| NMe         | 34.4, CH <sub>3</sub>                 | 35.7, CH <sub>3</sub>       | 3       | 34.4, CH <sub>3</sub>                | 35.7, CH <sub>3</sub>       |
| MeVal 1     | 168.2, C                              | 169.7, C                    | MeVal 1 | 168.3, C                             | 169.8, C                    |
| 2           | 69.5, CH                              | 72.1, CH                    | 2       | 69.5, CH                             | 72.4, CH                    |
| 3           | 26.5, CH                              | 28.2, CH                    | 3       | 26.3, CH                             | 27.9, CH                    |
| 4           | 21.0, CH <sub>3</sub>                 | 21.7, CH <sub>3</sub>       | 4       | 21.1, CH <sub>3</sub>                | 21.7, CH <sub>3</sub>       |
| 5           | 18.8, CH <sub>3</sub>                 | 19.4, CH <sub>3</sub>       | 5       | 18.8, CH <sub>3</sub>                | 19.4, CH <sub>3</sub>       |
| NMe         | 38.6, CH <sub>3</sub>                 | 39.6, CH <sub>3</sub>       | NMe     | 38.6, CH <sub>3</sub>                | 40.1, CH <sub>3</sub>       |
| chromophore |                                       |                             |         |                                      |                             |
| 2           | 165.5, C                              | 164.5, C                    | 9a      | 140.7, C                             | 142.8, C                    |
| 3a          | 133.2, C                              | 135.1, C                    | 10a     | 139.4, C                             | 141.5, C                    |
| 4           | 100.1, C                              | 101.7, C                    | 11      | 111.7, C                             | 113.5, C                    |
| 4a          | 132.1, C                              | 134.1, C                    | 11a     | 143.7, C                             | 145.6, C                    |
| 5a          | 131.4, C                              | 132.8, C                    | 12      | 14.8, CH <sub>3</sub>                | 15.4, CH <sub>3</sub>       |
| 6           | 113.5, C                              | 115.6, C                    | 13      | 8.9, CH <sub>3</sub>                 | 9.2, CH <sub>3</sub>        |
| 7           | 122.0, CH                             | 122.3, CH                   | 14      | 166.6, C                             | 168.8, C                    |
| 8           | 122.1, CH                             | 123.4, CH                   | 15      | 163.7, C                             | 167.7, C                    |
| 9           | 127.5, C                              | 129.1, C                    | 16      | 14.4, CH <sub>3</sub>                | 14.5, CH <sub>3</sub>       |

<sup>a</sup>  $^{13}\text{C}$  NMR data were recorded at 600 MHz.

**Table S4. <sup>1</sup>H NMR Spectroscopic Data for Neo-actinomycin B (2)<sup>a</sup>**

| pentapeptidolactone ( $\alpha$ -ring) |                             |                             | pentapeptidolactone ( $\beta$ -ring) |                             |                             |
|---------------------------------------|-----------------------------|-----------------------------|--------------------------------------|-----------------------------|-----------------------------|
| no.                                   | DMSO- <i>d</i> <sub>6</sub> | MeOH- <i>d</i> <sub>4</sub> | no.                                  | DMSO- <i>d</i> <sub>6</sub> | MeOH- <i>d</i> <sub>4</sub> |
| Thr 2                                 | 4.94, brd (9.6)             | 4.95, d (2.4)               | Thr 2                                | 4.94, brd (9.6)             | 5.01, d (2.4)               |
| 3                                     | 5.15, qd (6.6, 2.4)         | 5.33, d (6.0, 2.4)          | 3                                    | 5.23, qd (6.6, 2.4)         | 5.39, qd (6.0, 2.4)         |
| 4                                     | 1.17, d (6.6)               | 1.31, d (6.0)               | 4                                    | 1.18, d (6.6)               | 1.29, d (6.0)               |
| NH                                    | 7.28, d (9.6)               |                             | NH                                   | 9.64, d (9.6)               |                             |
| Val 2                                 | 3.51, m                     | 3.70, d (10.2)              | Val 2                                | 3.51, m                     | 3.66, d (10.2)              |
| 3                                     | 1.86, m                     | 2.04, m                     | 3                                    | 1.86, m                     | 2.06, m                     |
| 4                                     | 0.93, d (6.6)               | 1.08, d (6.6)               | 4                                    | 0.94, d (6.6)               | 1.08, d (6.6)               |
| 5                                     | 0.69, d (6.6)               | 0.86, d (6.0)               | 5                                    | 0.70, d (6.6)               | 0.85, d (6.6)               |
| NH                                    | 8.36, d (6.0)               |                             | NH                                   | 8.31, d (6.0)               |                             |
| Pro 2                                 | 6.25, dd (9.0, 3.6)         | 6.42, dd (9.0, 3.6)         | Pro 2                                | 6.21, dd (9.0, 3.6)         | 6.48, dd (9.0, 3.6)         |
| 3                                     | 2.09, m; 1.74, m            | 2.28, m; 1.94, m            | 3                                    | 2.09, m; 1.74, m            | 2.24, m; 1.90, m            |
| 4                                     | 1.90, m; 1.67, m            | 2.05, m; 1.83, m            | 4                                    | 1.90, m; 1.67, m            | 2.05, m; 1.83, m            |
| 5                                     | 3.48, m                     | 3.61, m; 3.51, m            | 5                                    | 3.48, m                     | 3.59, m; 3.49, m            |
| Sar 2                                 | 4.82, d (18.0)              | 4.96, d (17.4)              | Sar 2                                | 4.78, d (18.0)              | 4.90, d (18.0)              |
|                                       | 4.08, d (18.0)              | 4.12, d (17.4)              |                                      | 4.06, d (18.0)              | 4.09, d (18.0)              |
| NMe                                   | 2.75, s                     | 2.92, s                     | 3                                    | 2.75, s                     | 2.91, s                     |
| MeVal 2                               | 3.23, d (9.6)               | 3.19, d (9.0)               | MeVal 2                              | 3.25, d (9.6)               | 3.21, d (9.0)               |
| 3                                     | 2.58, m                     | 2.73, m                     | 3                                    | 2.55, m                     | 2.67, m                     |
| 4                                     | 1.00, d (6.6)               | 1.04, d (6.0)               | 4                                    | 0.97, d (6.6)               | 1.06, d (6.0)               |
| 5                                     | 0.79, d (6.6)               | 0.88, d (6.0)               | 5                                    | 0.80, d (6.6)               | 0.89, d (6.0)               |
| NMe                                   | 3.19, s                     | 3.26, s                     | NMe                                  | 3.27, s                     | 3.37, s                     |
| chromophore                           |                             |                             |                                      |                             |                             |
| 5                                     | 11.79, s                    |                             | 12                                   | 2.15, s                     | 2.10, s                     |
| 7                                     | 7.13, d (8.4)               | 6.96, d (8.4)               | 13                                   | 2.28, s                     | 2.26, s                     |
| 8                                     | 6.63, d (8.4)               | 6.51, d (8.4)               | 16                                   | 2.63, s                     | 2.58, s                     |

<sup>a</sup> <sup>1</sup>H NMR data were recorded at 600 MHz.

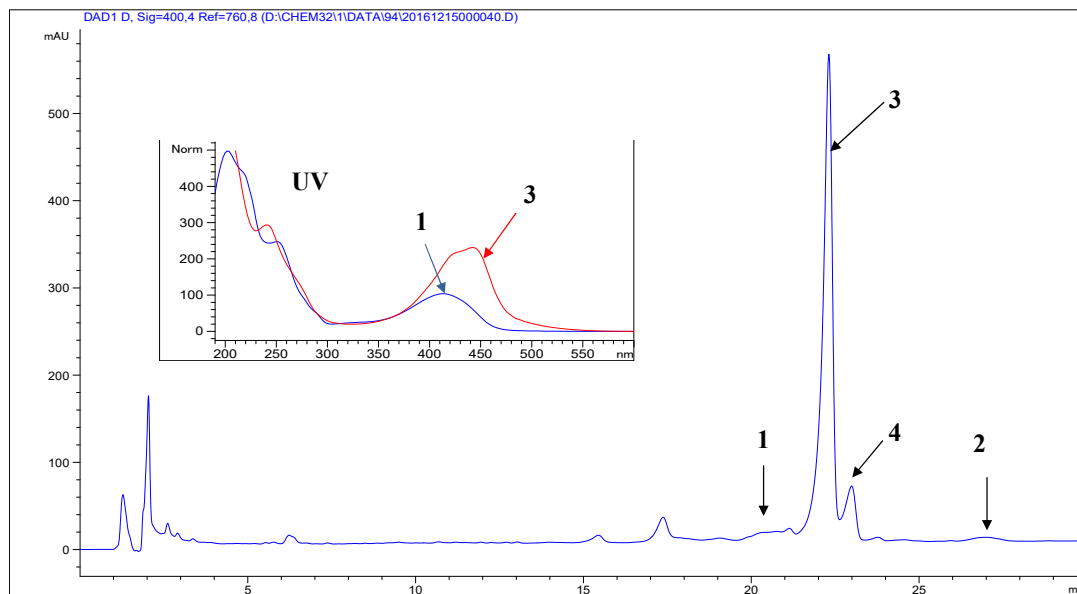

**Figure S1.** Typical HPLC chromatogram at 400 nm and UV spectra for crude extracts of strain IMB094 cultures under normal fermentation conditions.

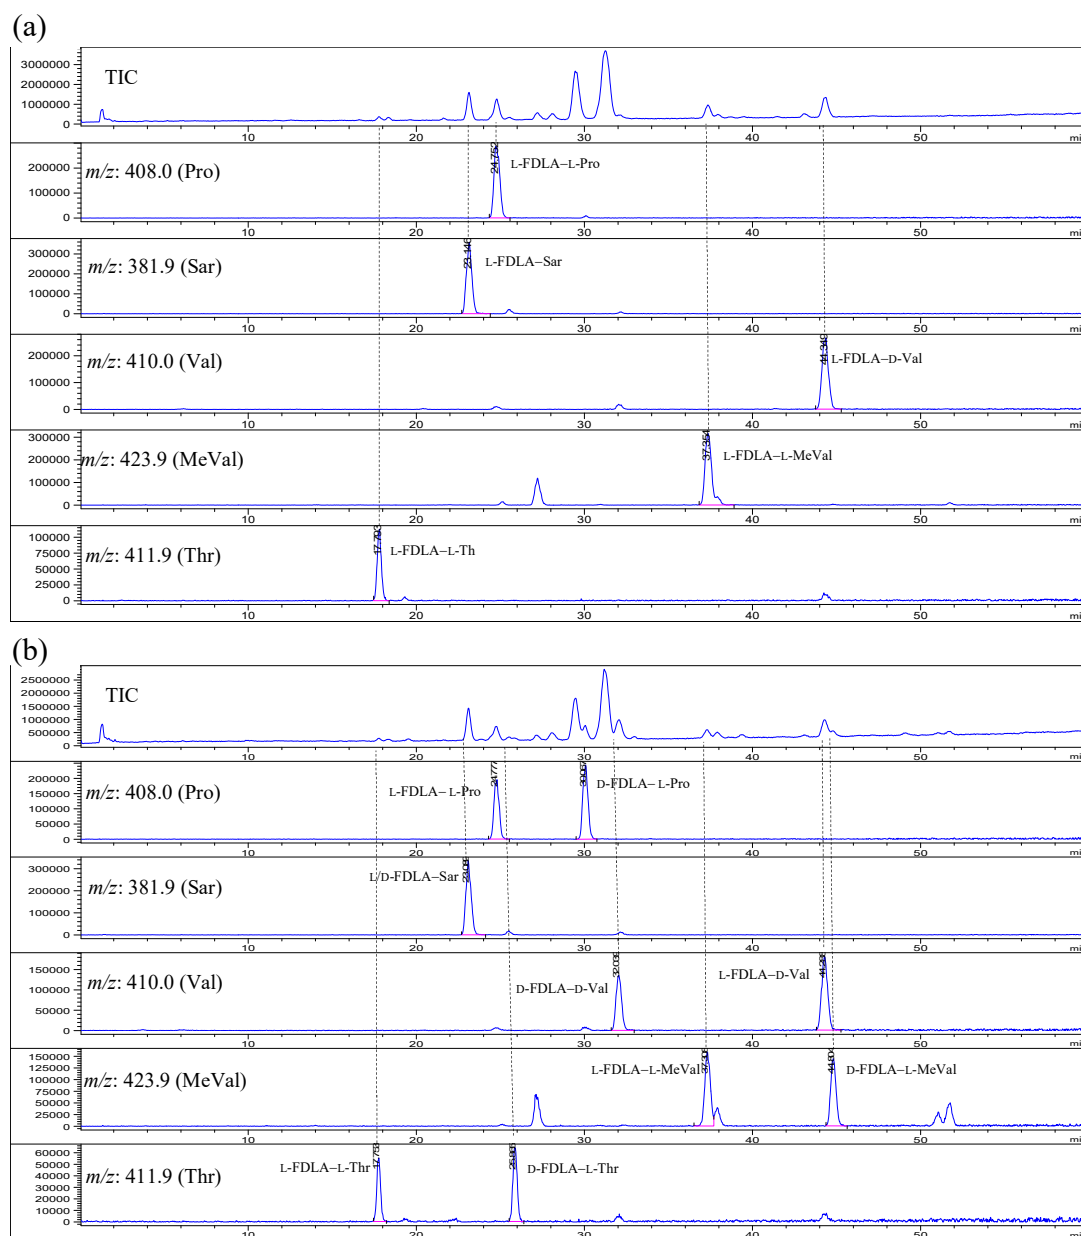

**Figure S2.** LC-MS chromatograms of (a) L-FDLA and (b) L/D-FDLA derivatives of the hydrolyzate of **1** recorded at negative ion mode

**Table S2.** LC-MS RetentionTimes ( $t_R$ , minute) of the Derivatized Amino Acids from the Hydrolyzate of **1**.

|         | m/z [M-H] <sup>-</sup> | L-FDLA-derivate | L/D-FDLA-derivate |
|---------|------------------------|-----------------|-------------------|
| L-Pro   | 408.0                  | 24.75           | 24.78             |
|         |                        |                 | 30.07             |
| Sar     | 381.9                  | 23.15           | 23.09             |
| D-Val   | 410.0                  | 44.35           | 32.04             |
|         |                        |                 | 44.29             |
| L-MeVal | 423.9                  | 37.35           | 37.31             |
|         |                        |                 | 44.80             |
| L-Thr   | 411.9                  | 17.79           | 17.75             |
|         |                        |                 | 25.87             |



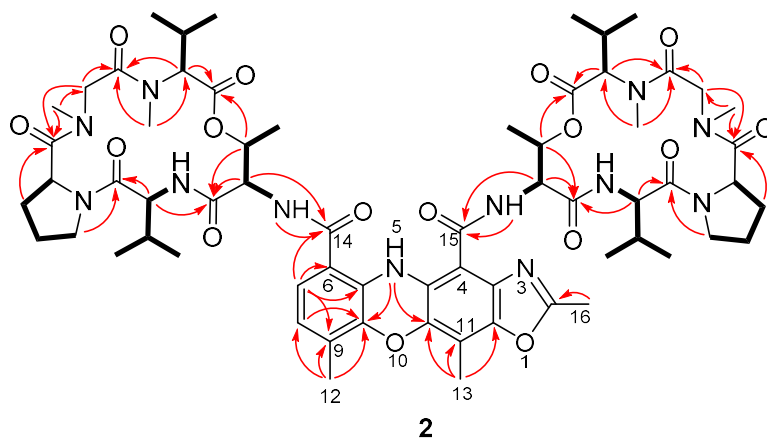

**Figure S3.** Key HMBC and  $^1\text{H}$ - $^1\text{H}$  COSY correlations of **2**.

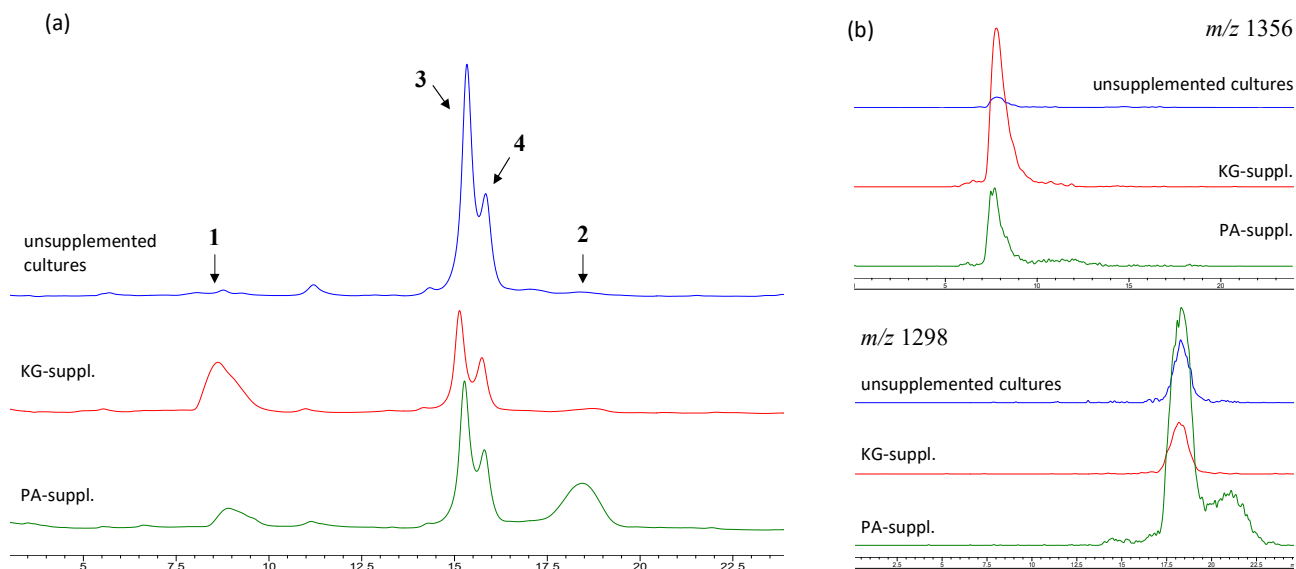

**Figure S4.** LC-MS analysis of neo-actinomycins in the cultures extracts of strain IMB094 in the feeding experiments (a) Chromatograms at 400 nm for unsupplemented cultures; cultures supplemented with 1mg/mL of  $\alpha$ -ketoglutaric acid (KG) and cultures supplemented with 1mg/mL of pyruvic acid (PA); (b) Extracted ion chromatographs are shown for neo-actinomycins A (**1**,  $[\text{M}+\text{NH}_4]^+ = 1356$ ) and B (**2**,  $[\text{M}+\text{NH}_4]^+ = 1298$ )

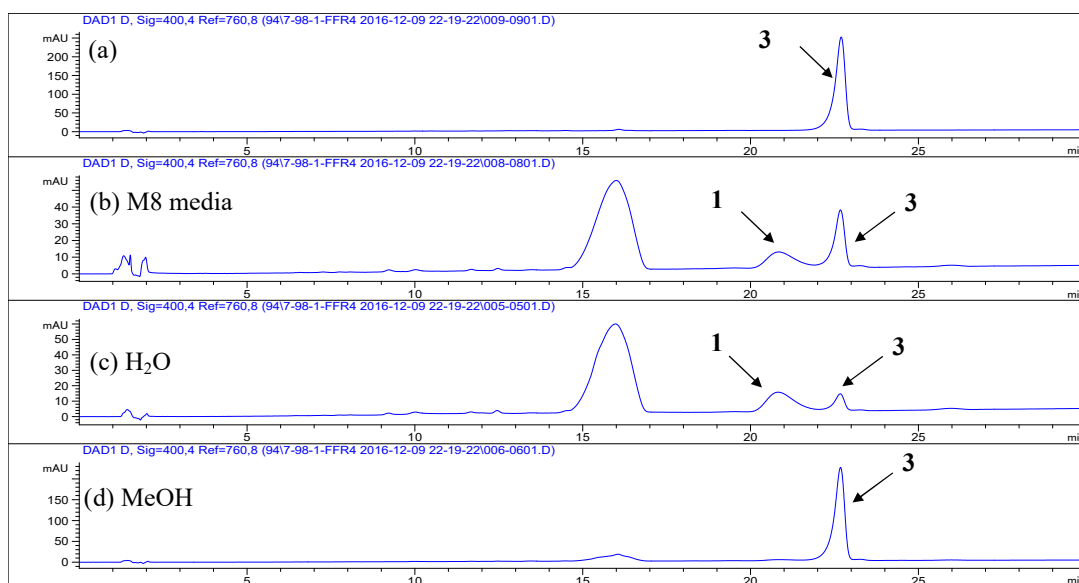

**Figure S5.** LC-MS traces at 400 nm for (a) actinomycin D (**3**) and conversion of **3** to **1** with  $\alpha$ -ketoglutaric acid in the fermentation M8 media (b), H<sub>2</sub>O (c), and MeOH (d) (LC-MS condition: Capcell MGII C-18 3 $\mu$ M, 3.0 mm  $\times$  150 mm; mobile phase A: H<sub>2</sub>O containing 0.1% formic acid; B: MeCN containing 0.1% formic acid; gradient conditions: 0–30 min linear gradient 35–80% B; flow rate: 0.5 mL/min)

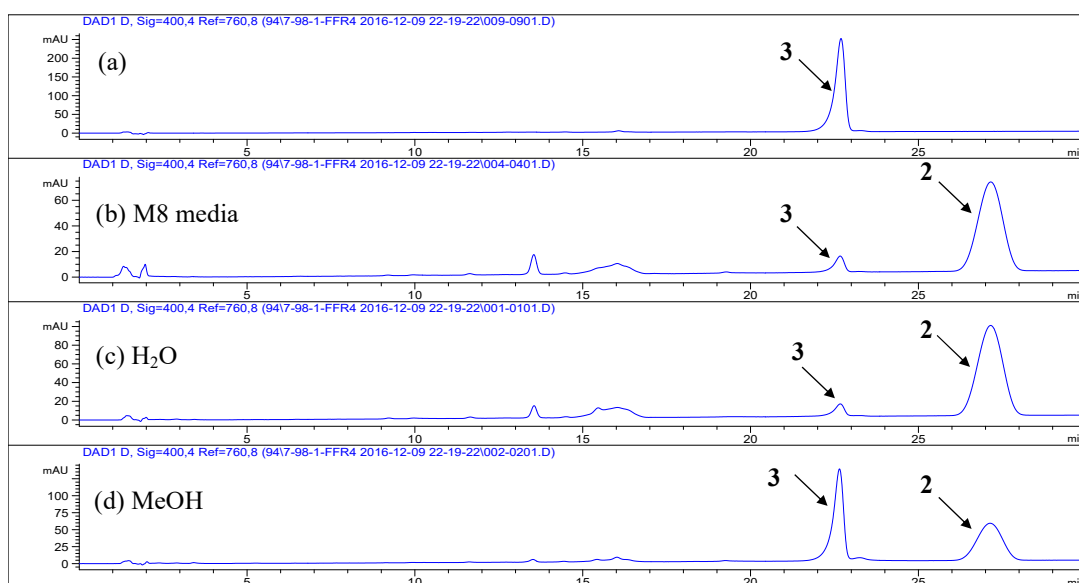

**Figure S6.** LC-MS traces at 400 nm for (a) actinomycin D (**3**) and conversion of **3** to **2** with pyruvic acid in the fermentation M8 media (b), H<sub>2</sub>O (c), and MeOH (d) after 36 h. (LC-MS condition: Capcell MGII C-18 3 $\mu$ M, 3.0 mm  $\times$  150 mm; mobile phase A: H<sub>2</sub>O containing 0.1% formic acid; B: MeCN containing 0.1% formic acid; gradient conditions: 0–30 min linear gradient 35–80% B; flow rate: 0.5 mL/min)

**Table S6.** Conversion rates (%) of actinomycin D with  $\alpha$ -ketoglutaric acid and pyruvic acid into neo-actinomycins A (**1**) and B (**2**) in MeOH and H<sub>2</sub>O under different pH <sup>a</sup>

| pH condition | <b>1</b> |                  | <b>2</b> |                  |
|--------------|----------|------------------|----------|------------------|
|              | MeOH     | H <sub>2</sub> O | MeOH     | H <sub>2</sub> O |
| pH 1.0       | 0%       | 14.9%            | 4.0%     | 36.6%            |
| pH 2.0       | 0%       | 18.7%            | 5.1%     | 52.3%            |
| pH 4.0       | 0%       | 0%               | 0.8%     | 3.1%             |

<sup>a</sup> The pH 2.0 is the original pH value of the reaction mixtures (actinomycin D with  $\alpha$ -ketoglutaric acid or pyruvic acid) without adjusting. The pH 1.0 and 4.0 was adjusted using 5 M HCl and 5 M ammonium hydroxide, respectively.

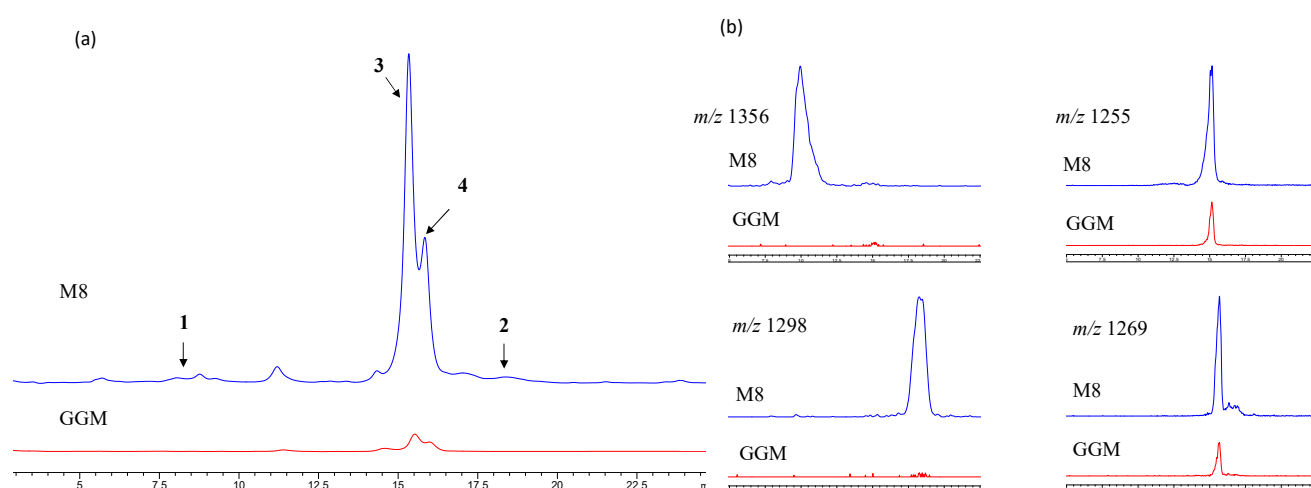

**Figure S7.** LC-MS analysis of actinomycin analogs in the cultures extracts of strain IMB094 grown in the M8 and GGM media. (a) Chromatograms at 400 nm; (b) Extracted ion chromatographs are shown for neo-actinomycins A (**1**,  $[M+NH_4]^+ = 1356$ ), B (**2**,  $[M+NH_4]^+ = 1298$ ), actinomycins D (**3**,  $[M+H]^+ = 1255$ ) and X2 (**4**,  $[M+H]^+ = 1269$ ).

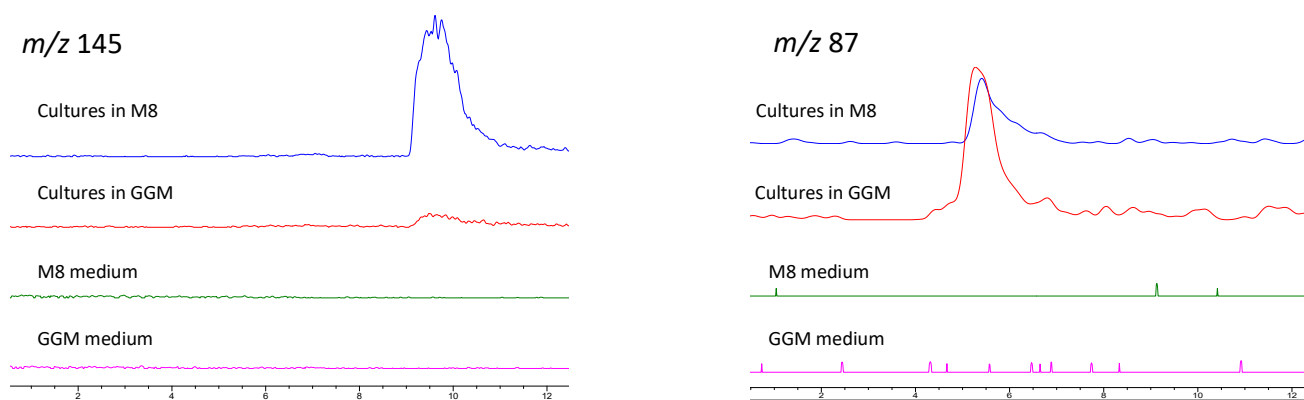

**Figure S8.** LC-MS analysis of  $\alpha$ -ketoglutarate and pyruvate in the cultures extracts of strain IMB094 and in the media prior to cultivation. Extracted ion chromatographs are shown for  $\alpha$ -ketoglutarate ( $[M-H]^- = 145$ ) and pyruvate ( $[M-H]^- = 87$ ).

**Table S7.** Concentrations of compounds **1–4**,  $\alpha$ -ketoglutarate, and pyruvate in the fermentation broth cultured in M8 and GGM media ( $\mu\text{g/mL}$ )

| Media | <b>1</b> | <b>2</b> | <b>3</b> | <b>4</b> | $\alpha$ -ketoglutarate | pyruvate |
|-------|----------|----------|----------|----------|-------------------------|----------|
| M8    | 12.2     | 3.7      | 39.9     | 23.3     | 39.4                    | 7.7      |
| GGM   | 0.0      | 0        | 2.8      | 1.6      | 3.9                     | 21.4     |

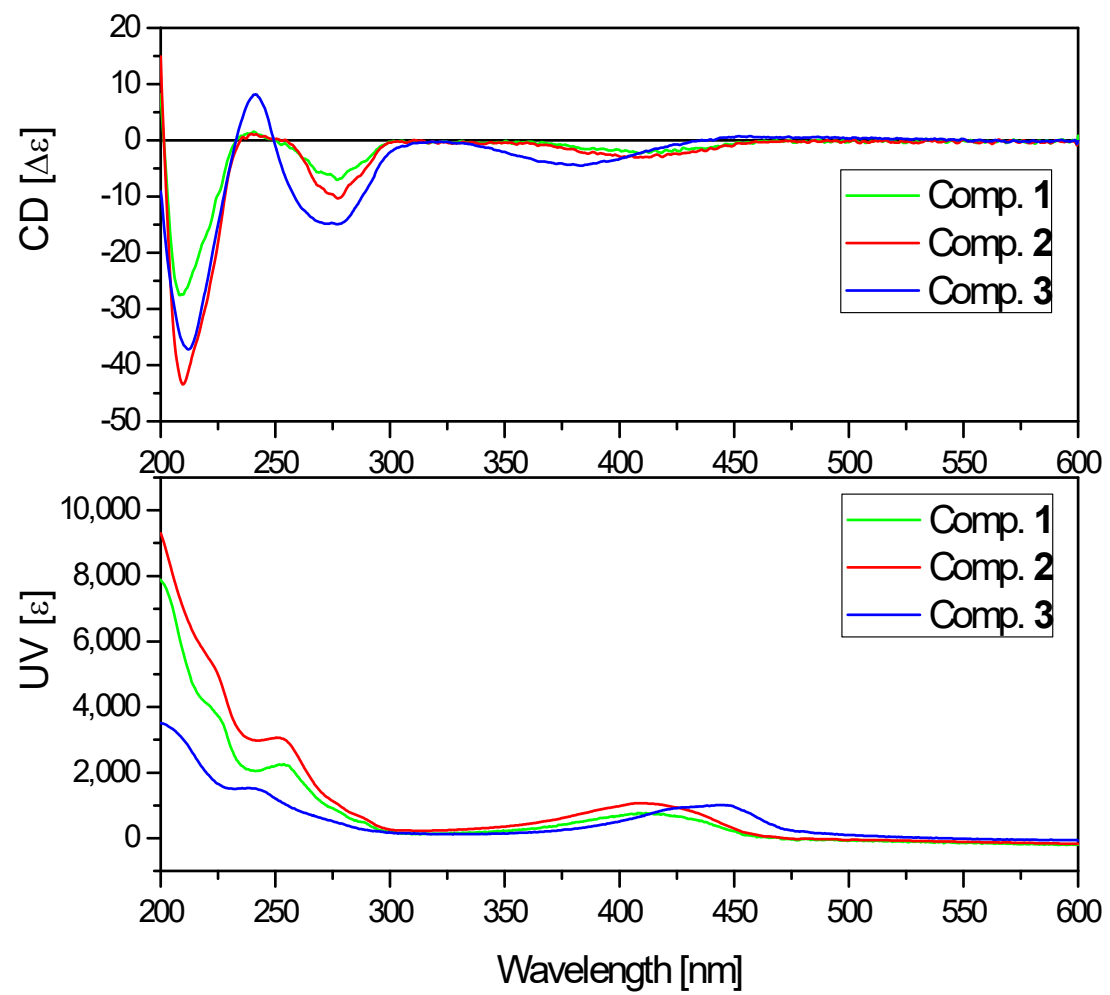

Figure S9. The CD and UV spectra of compounds 1–3 recorded in MeOH.

94-7 #58 RT: 0.85 AV: 1 NL: 1.46E7  
T: FTMS + c ESI Full ms [150.00-2000.00]

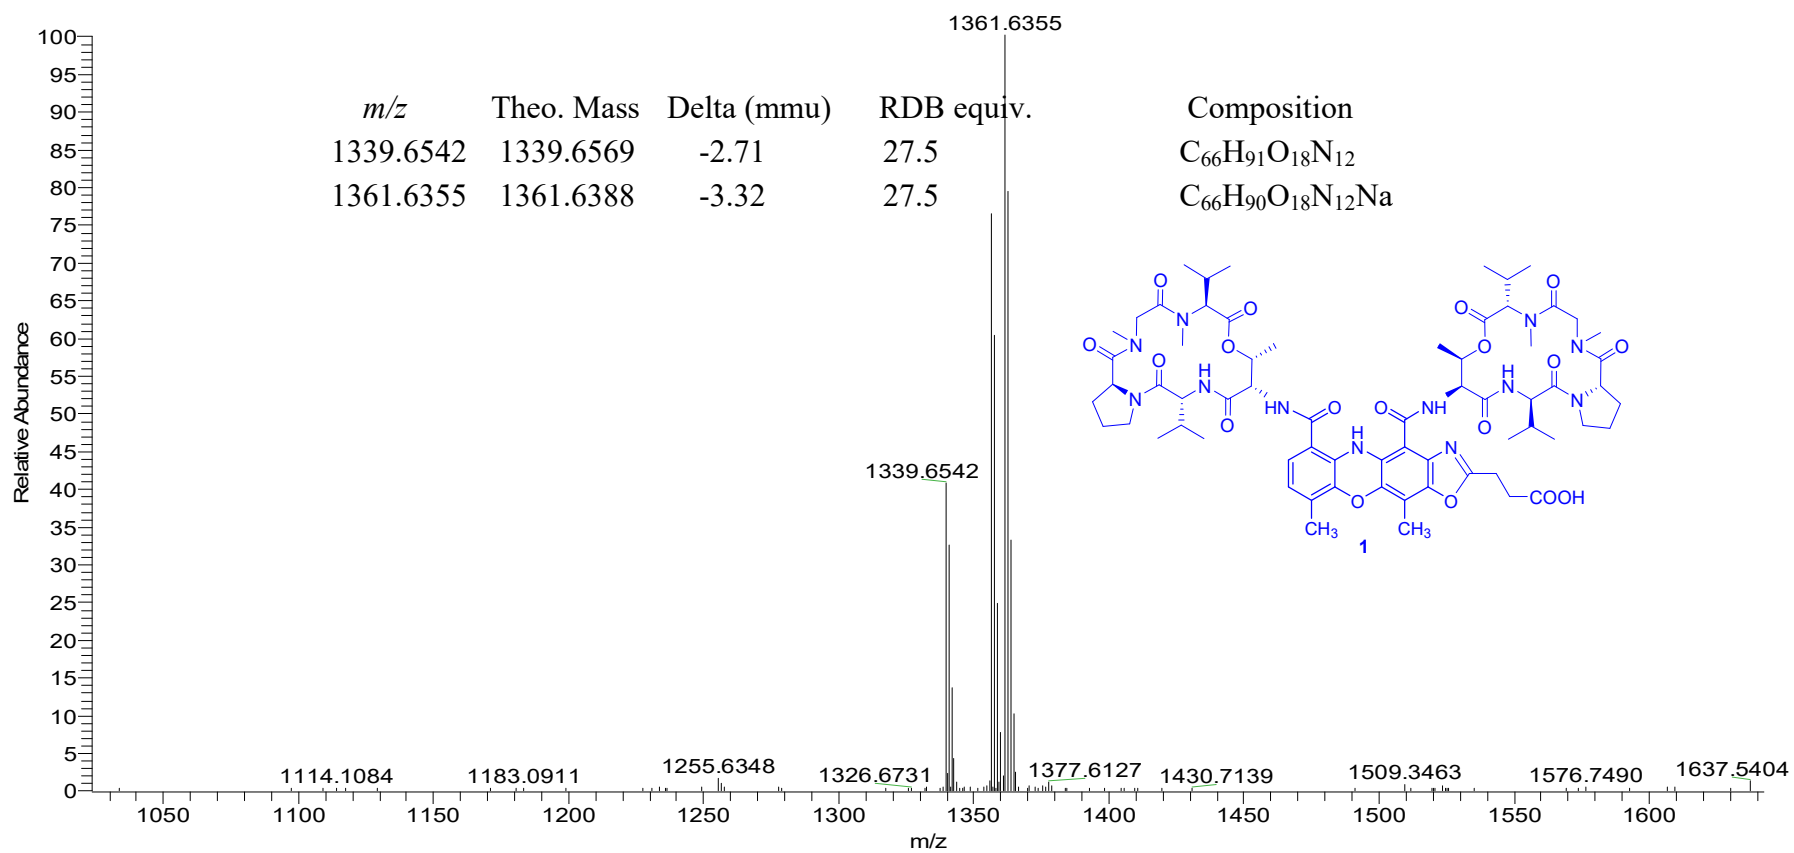

Figure S10. The (+)-HRESIMS spectrum of neo-actinomycin A (1).

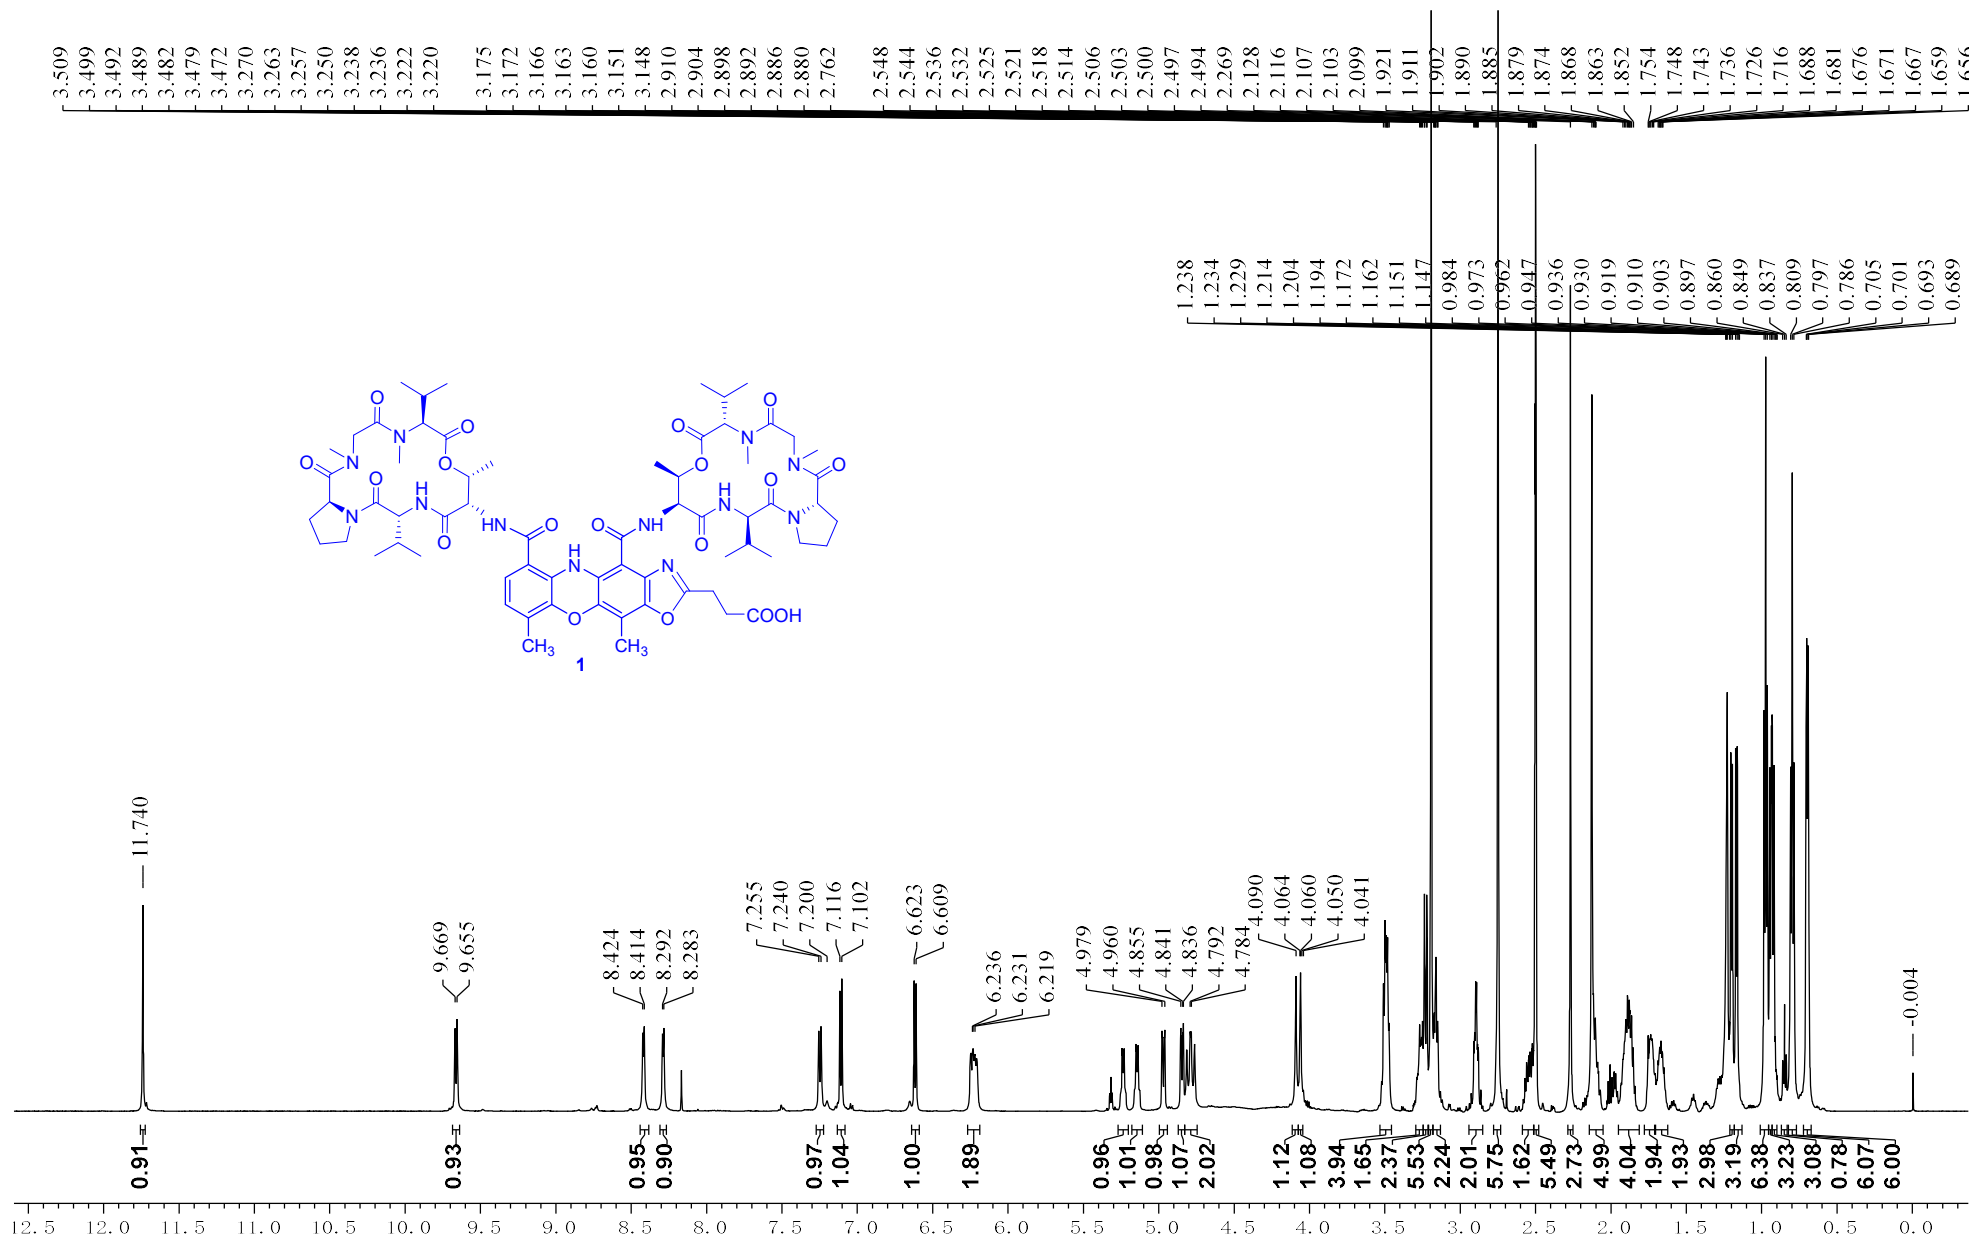

Figure S11. The <sup>1</sup>H NMR spectrum of neo-actinomycin A (1) in DMSO-d<sub>6</sub> (600 MHz).

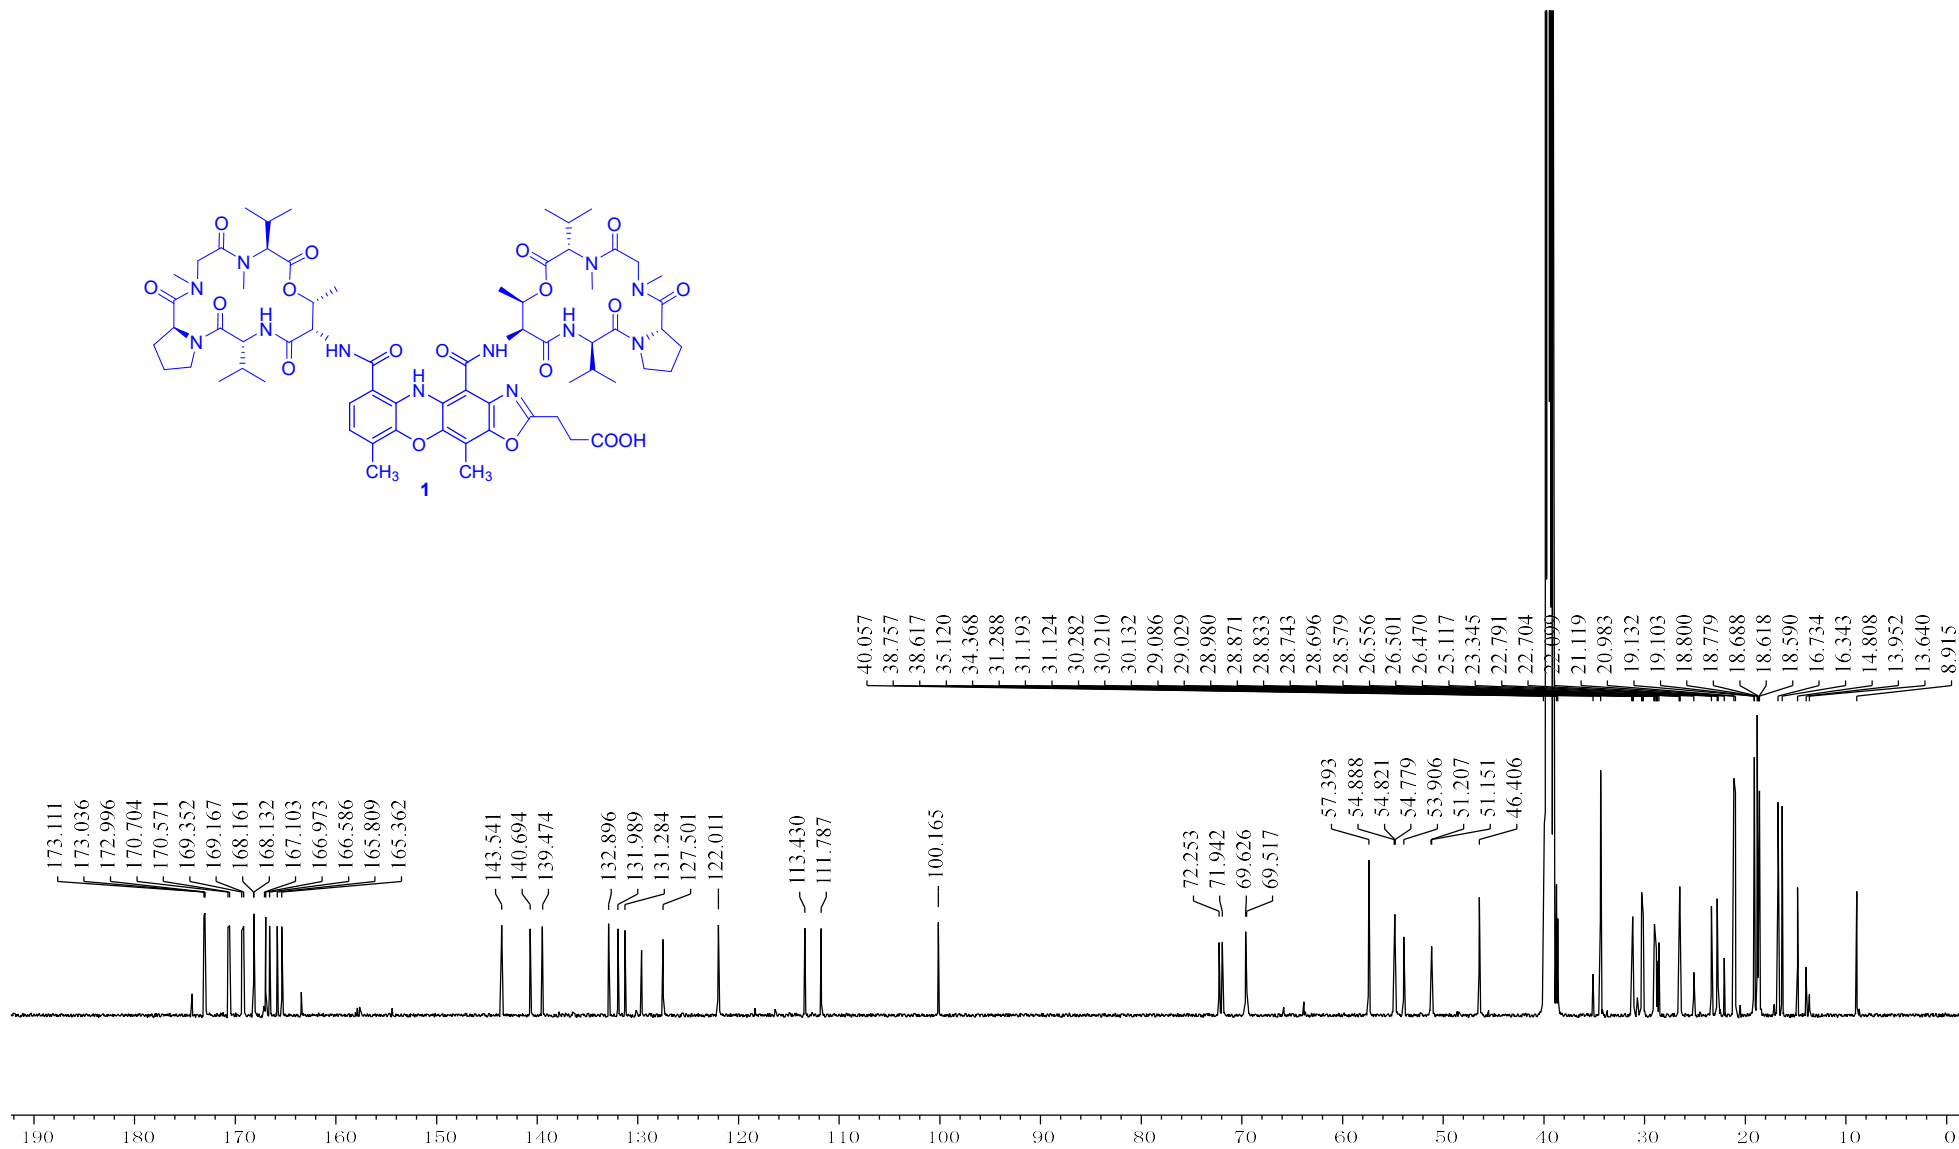

Figure S12. The <sup>13</sup>C NMR spectrum of neo-actinomycin A (1) in DMSO-*d*<sub>6</sub> (150 MHz).



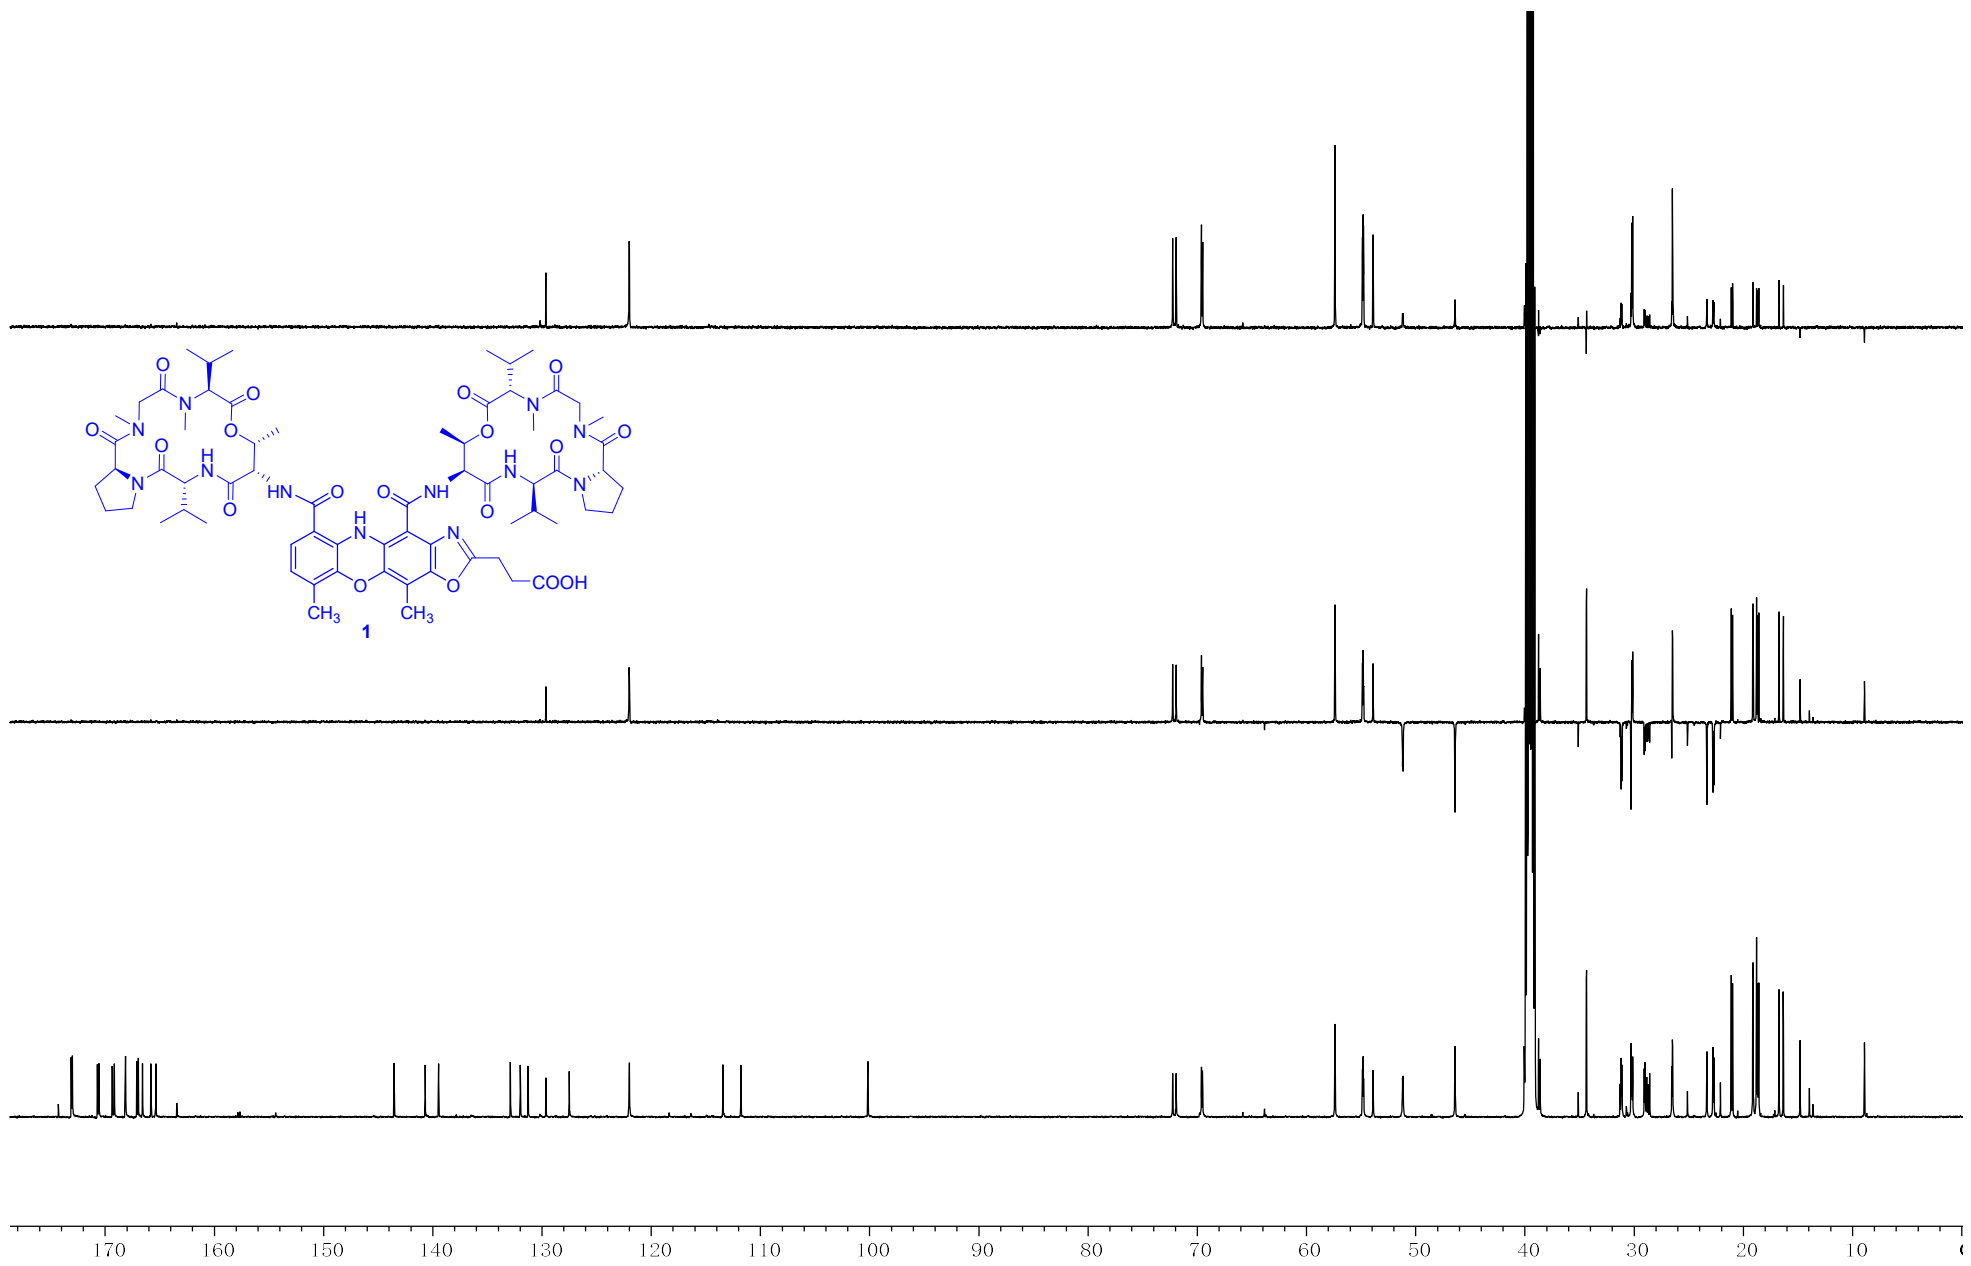

**Figure S13.** The DEPT spectrum of neo-actinomycin A (**1**) in DMSO-*d*<sub>6</sub> (150 MHz).



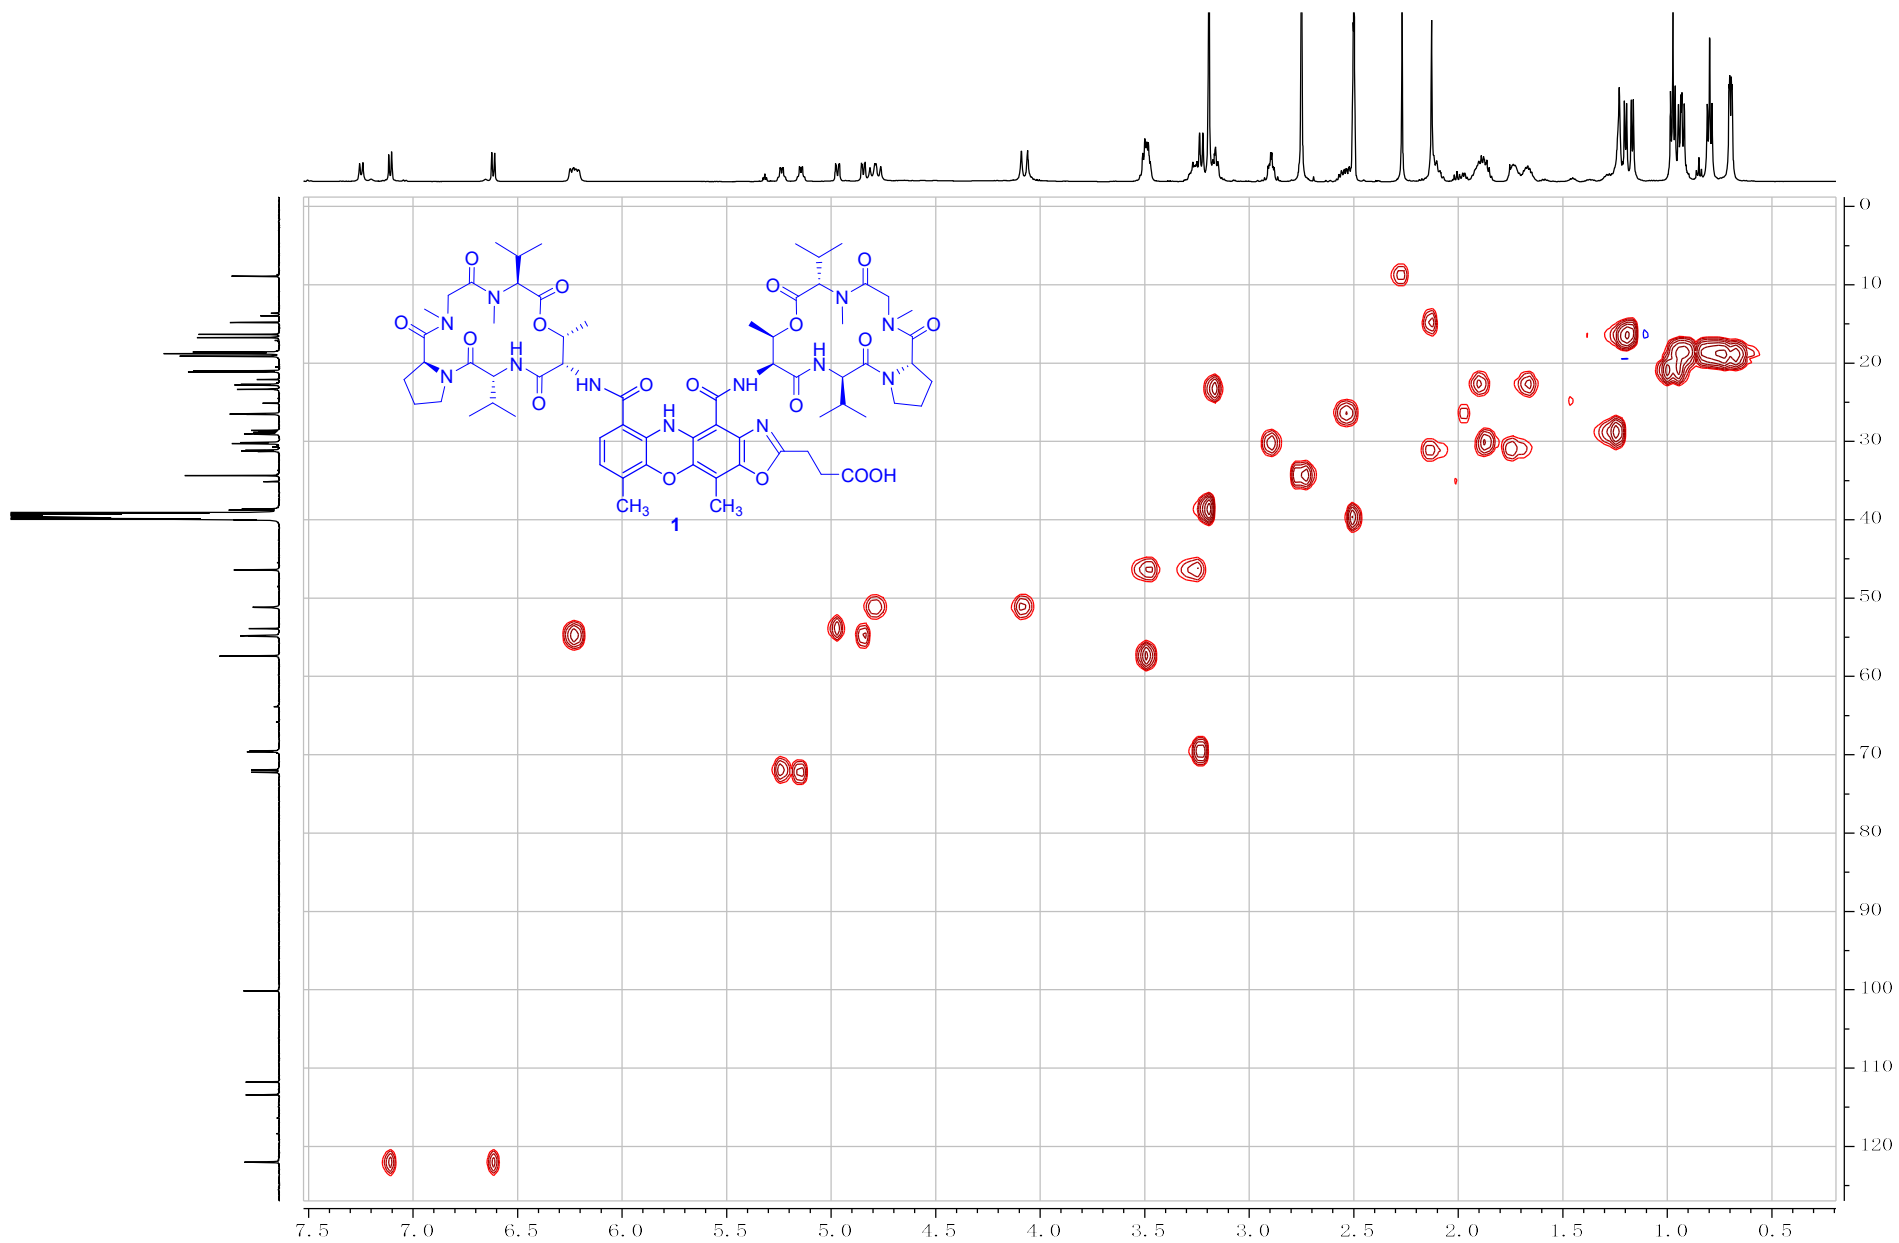

**Figure S15.** The HSQC spectrum of neo-actinomycin A (**1**) in DMSO-*d*<sub>6</sub> (600 MHz).

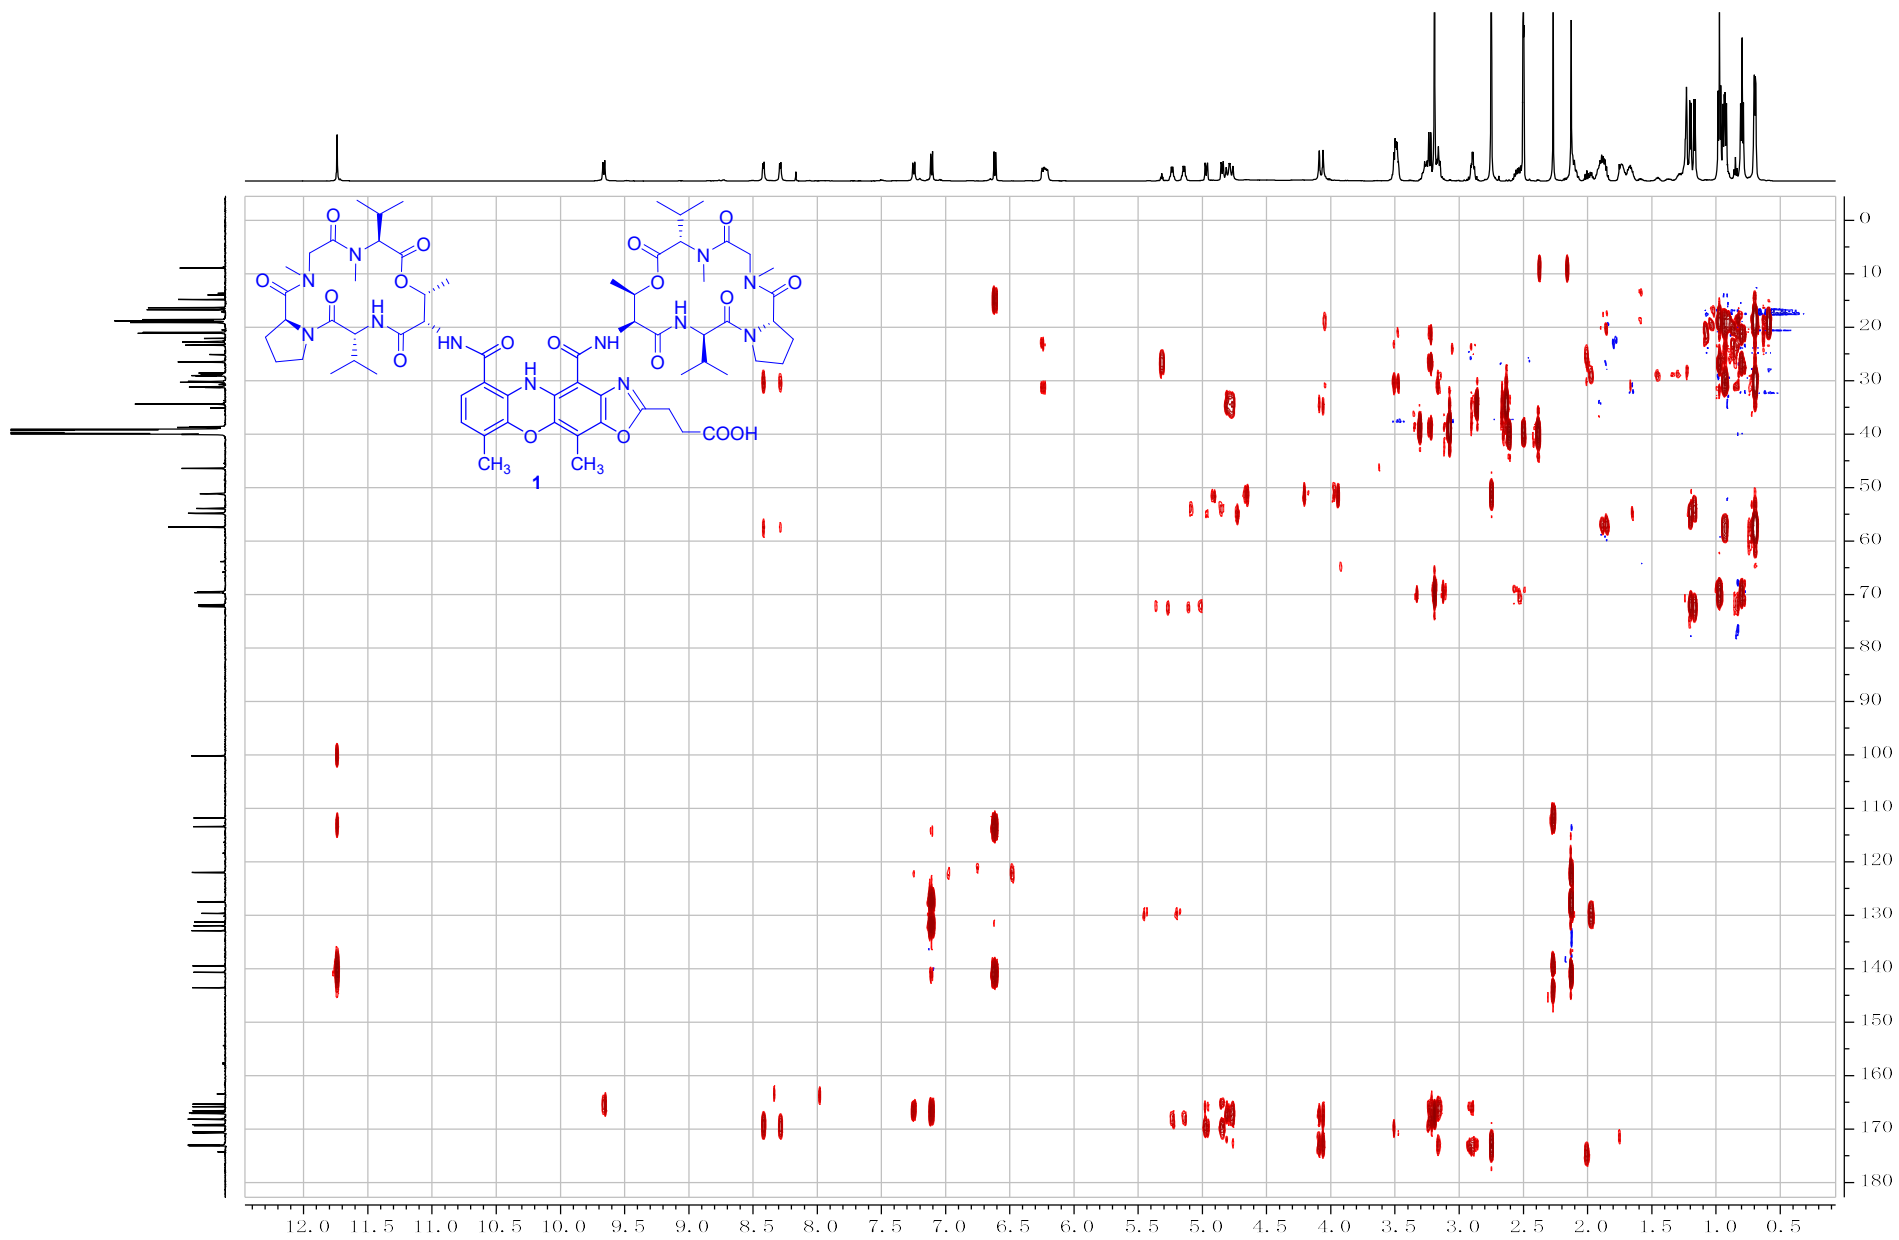

**Figure S16.** The HMBC spectrum of neo-actinomycin A (**1**) in DMSO- $d_6$  (600 MHz).

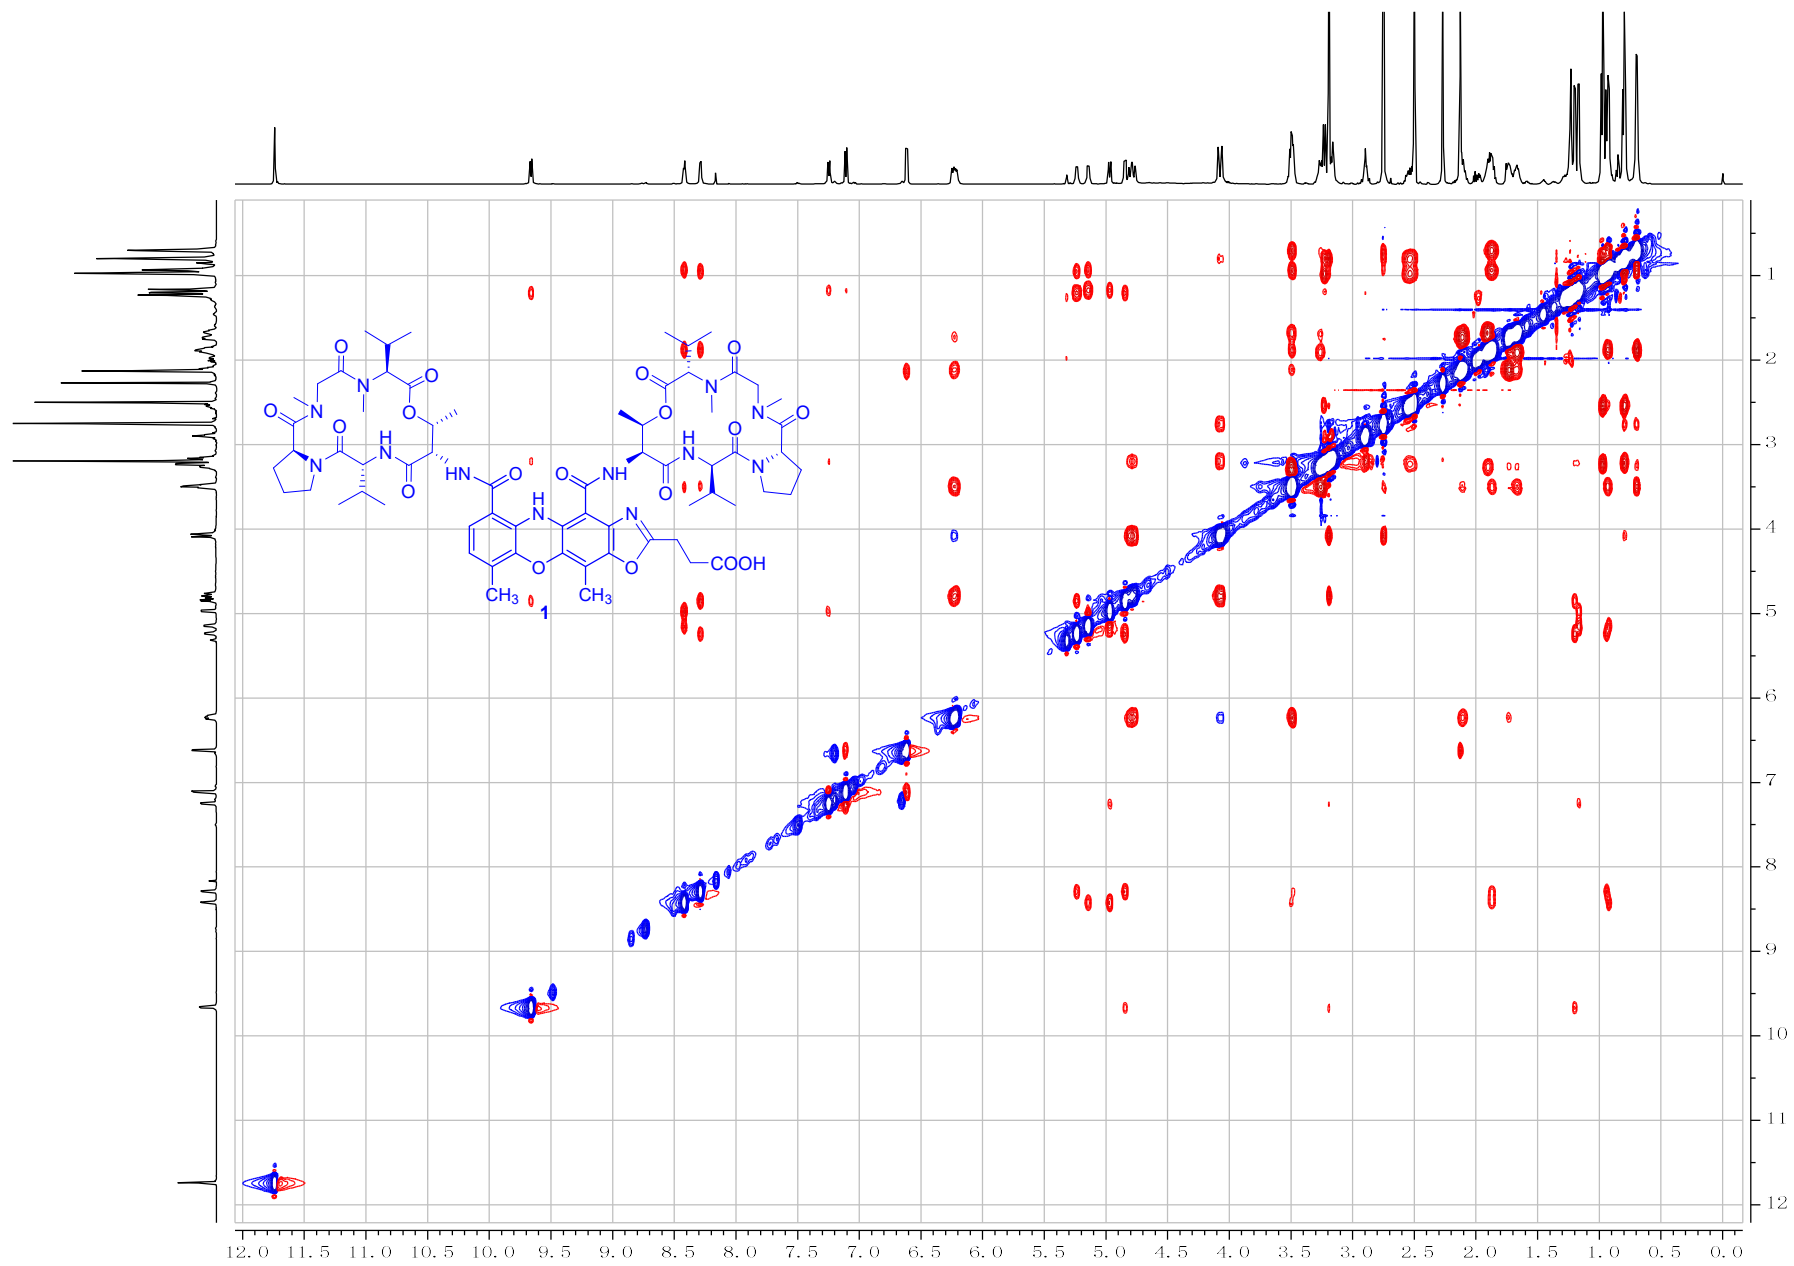

Figure S17. The ROESY spectrum of neo-actinomycin A (1) in DMSO- $d_6$  (600 MHz).

94-1 HRESIMS #4 RT: 0.08 AV: 1 NL: 5.56E6  
T: FTMS + p ESI Full ms [100.00-2000.00]

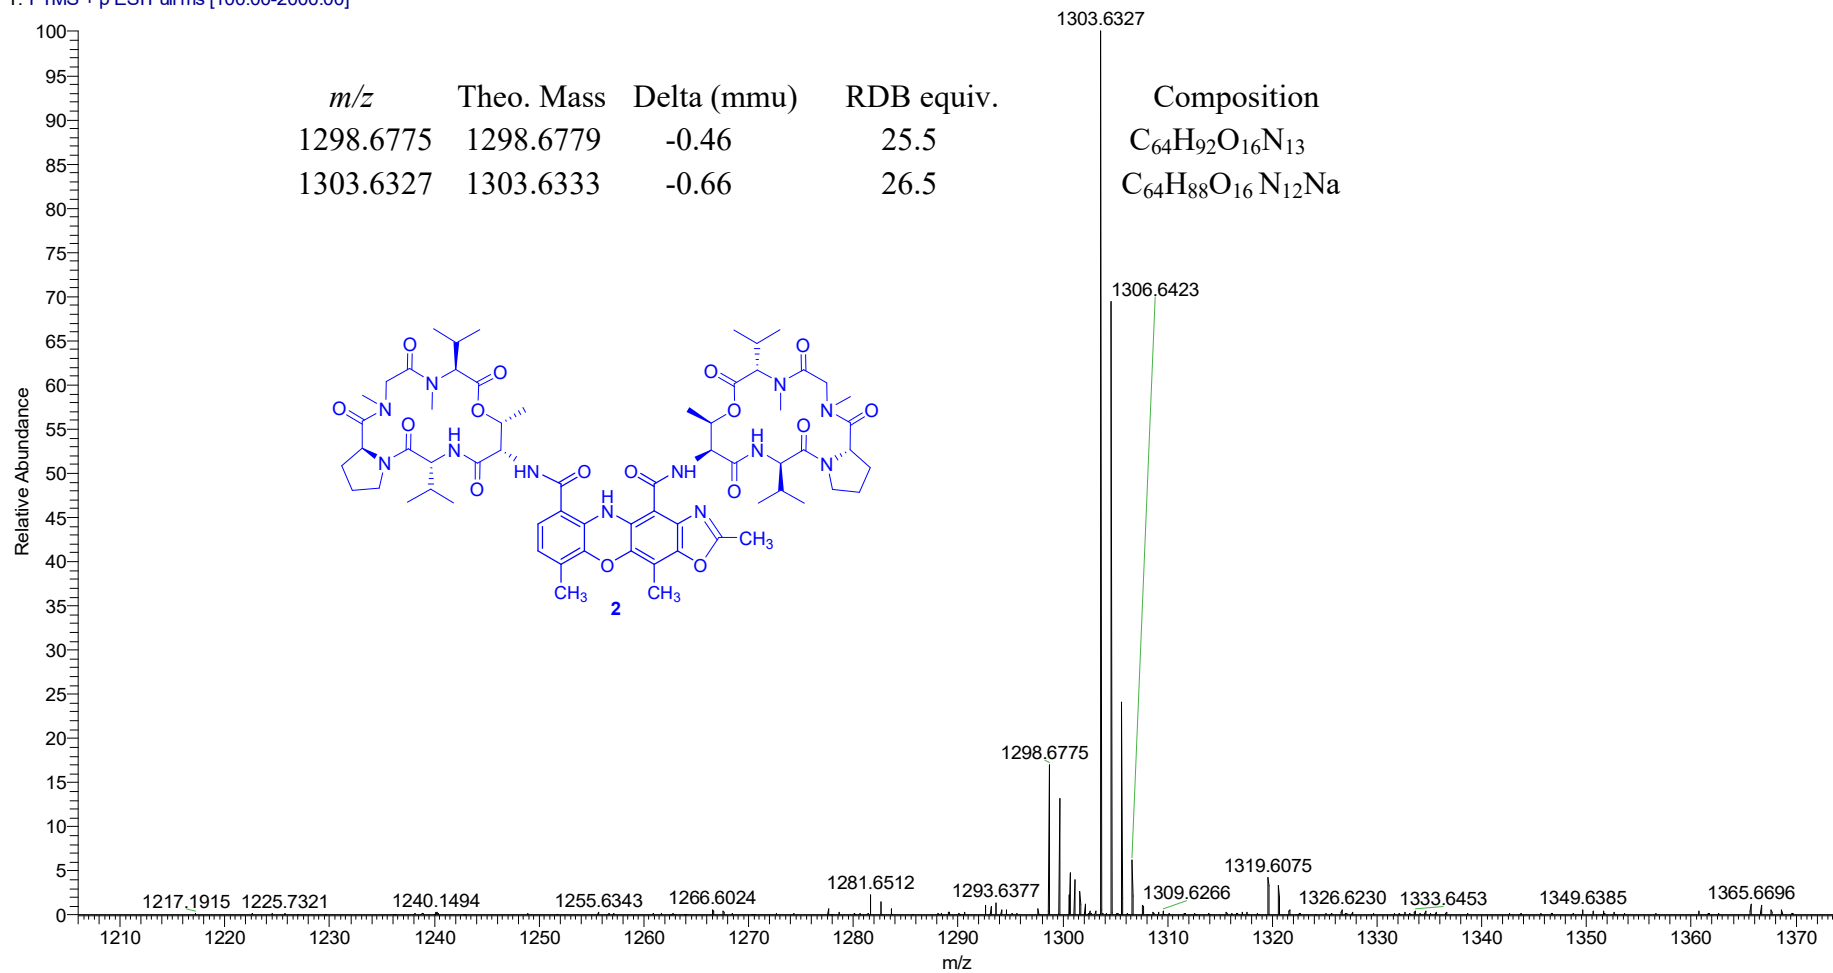

Figure S18. The (+)-HRESIMS spectrum of neo-actinomycin B (2).

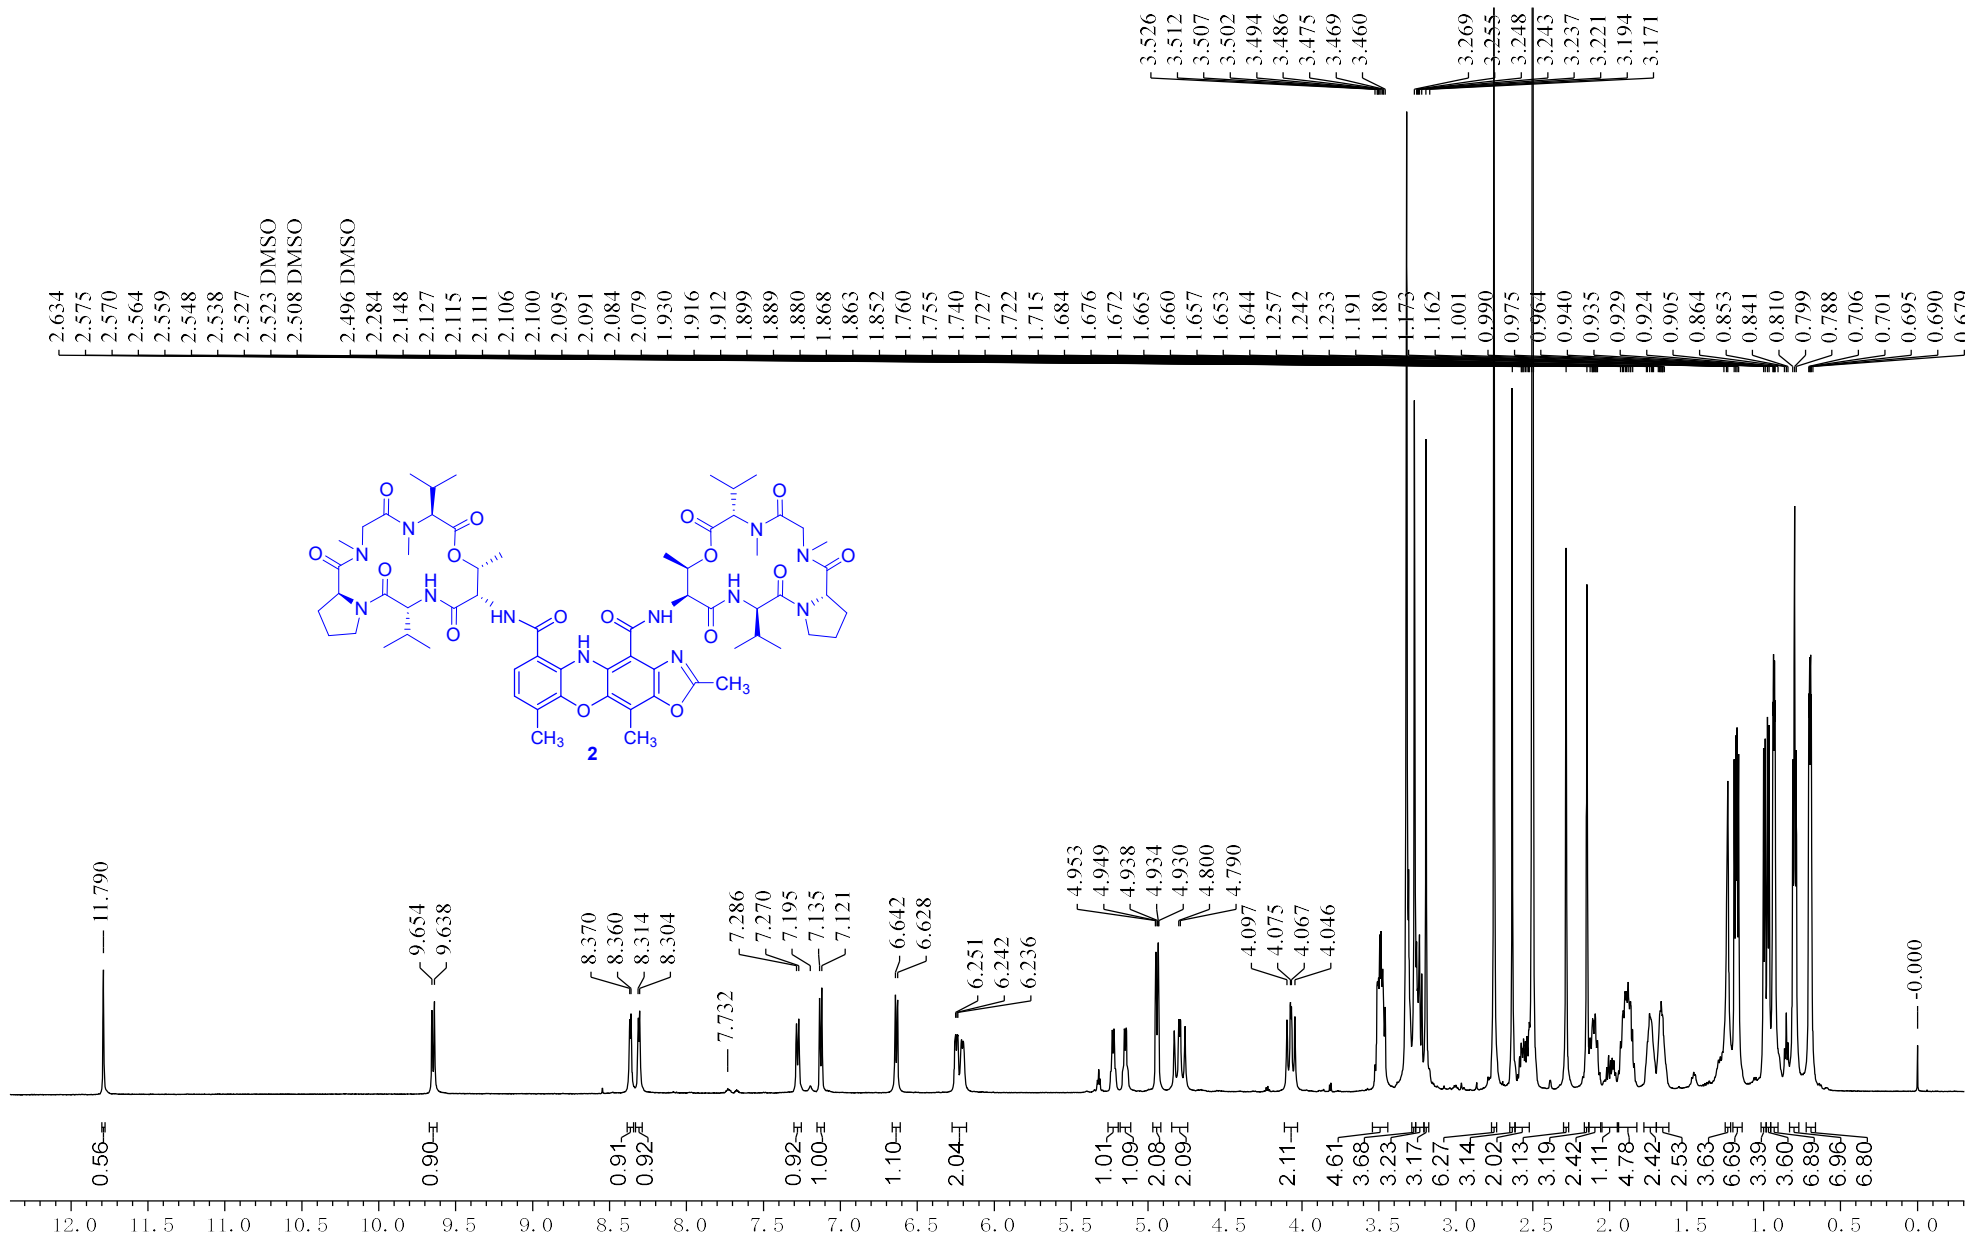

Figure S19. The <sup>1</sup>H NMR spectrum of neo-actinomycin B (2) in DMSO-*d*<sub>6</sub> (600 MHz).

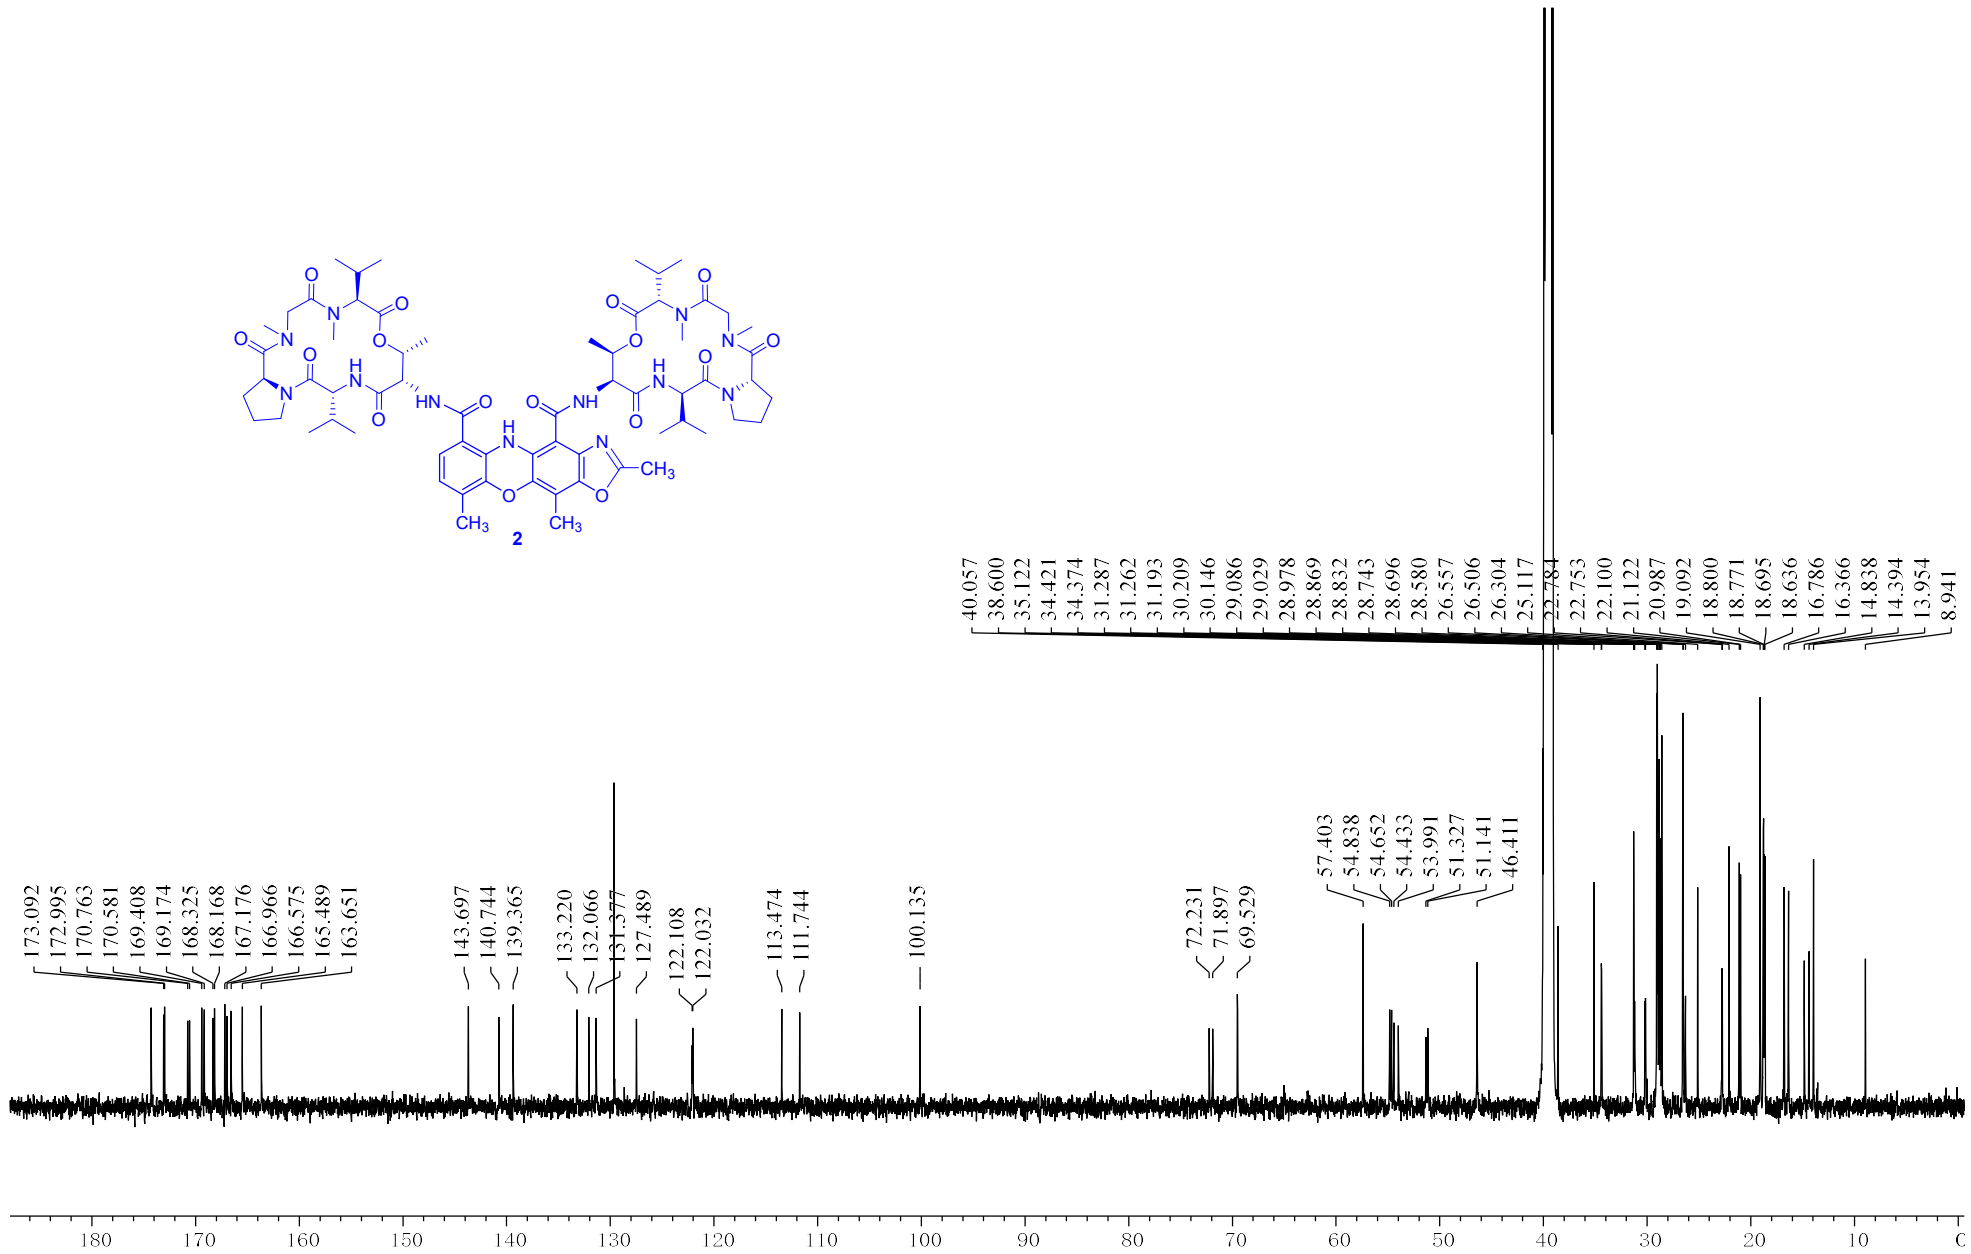

**Figure S20.** The <sup>13</sup>C NMR spectrum of neo-actinomycin B (2) in DMSO-*d*<sub>6</sub> (150 MHz).



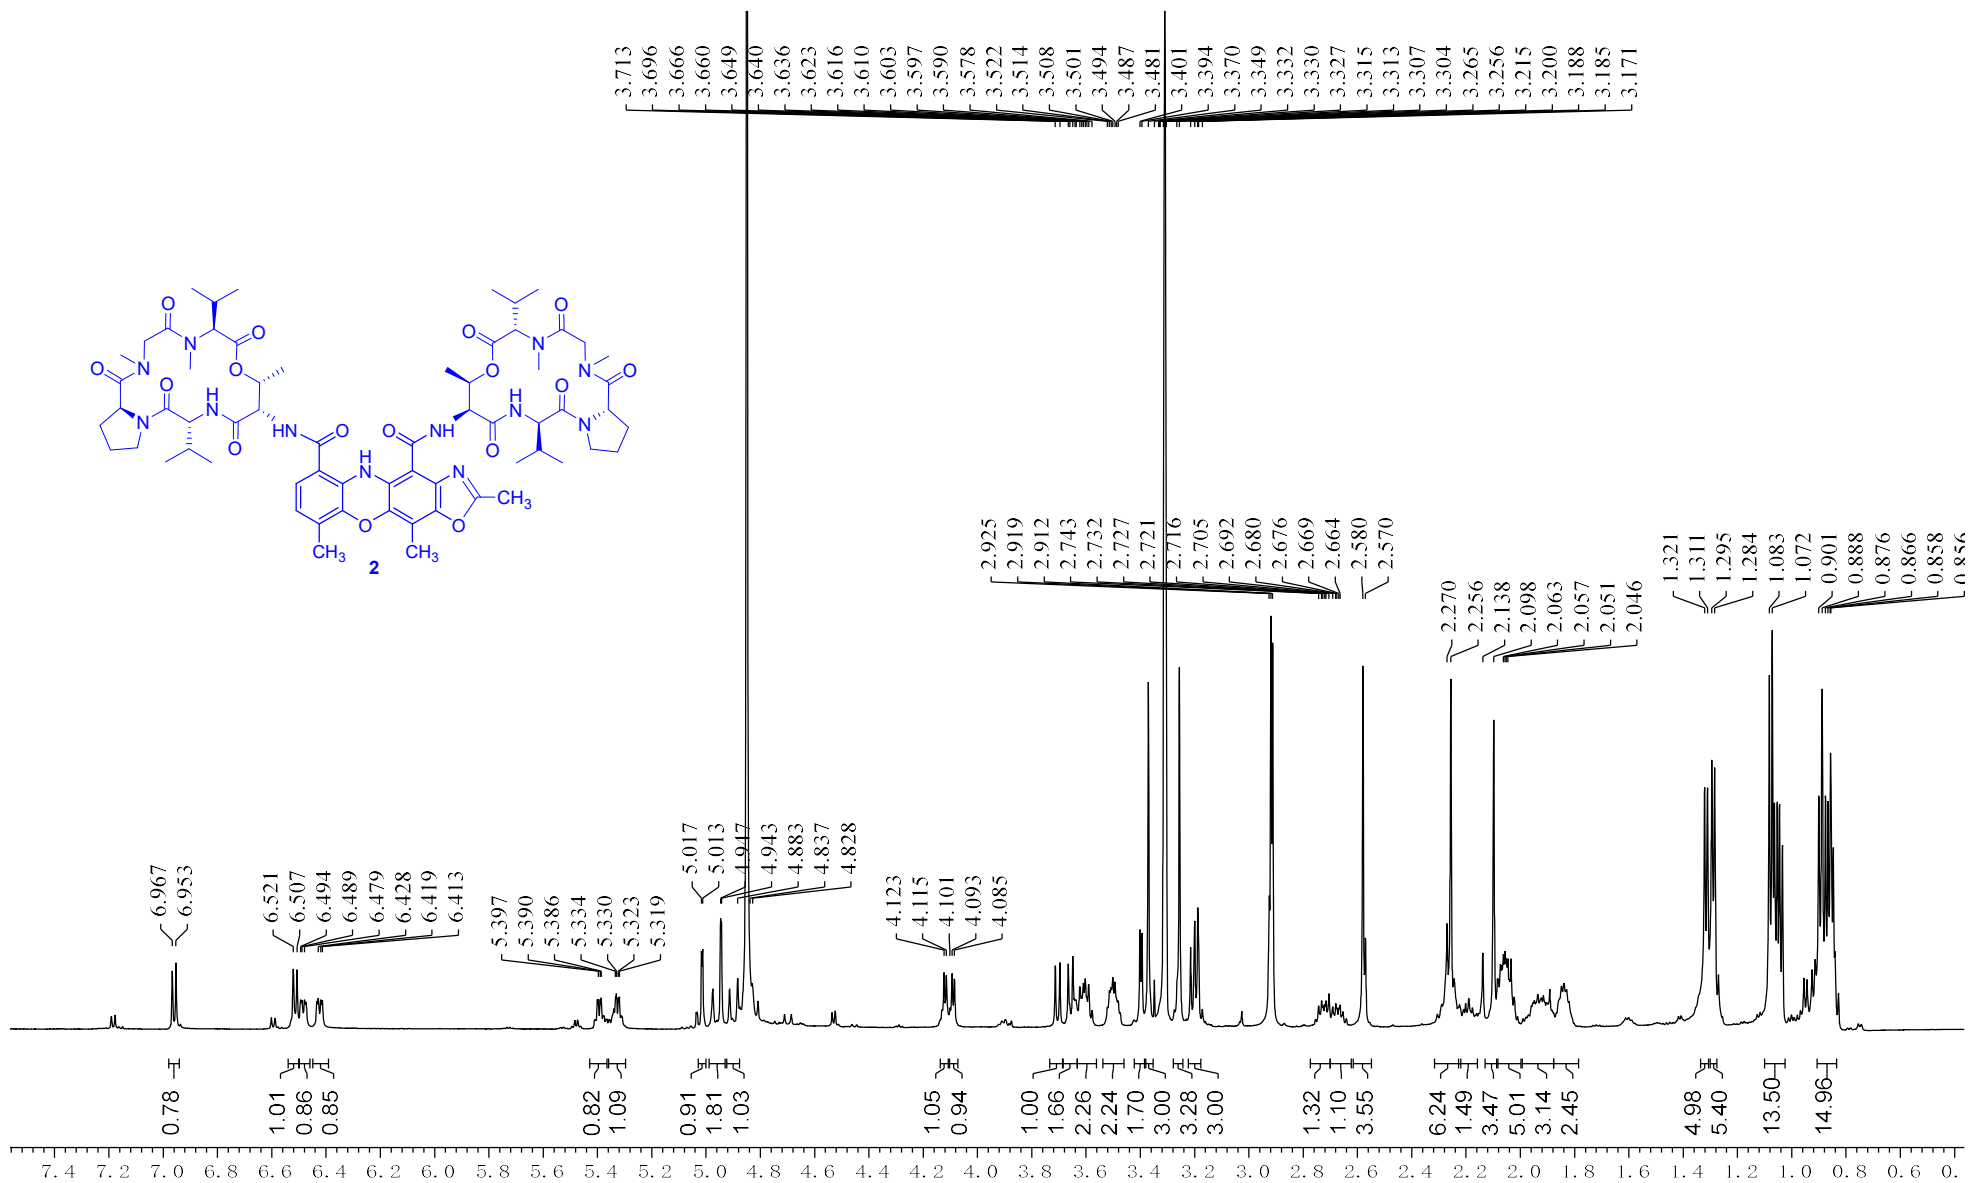

Figure S21. The <sup>1</sup>H NMR spectrum of neo-actinomycin B (2) in MeOH-d<sub>4</sub> (600 MHz).

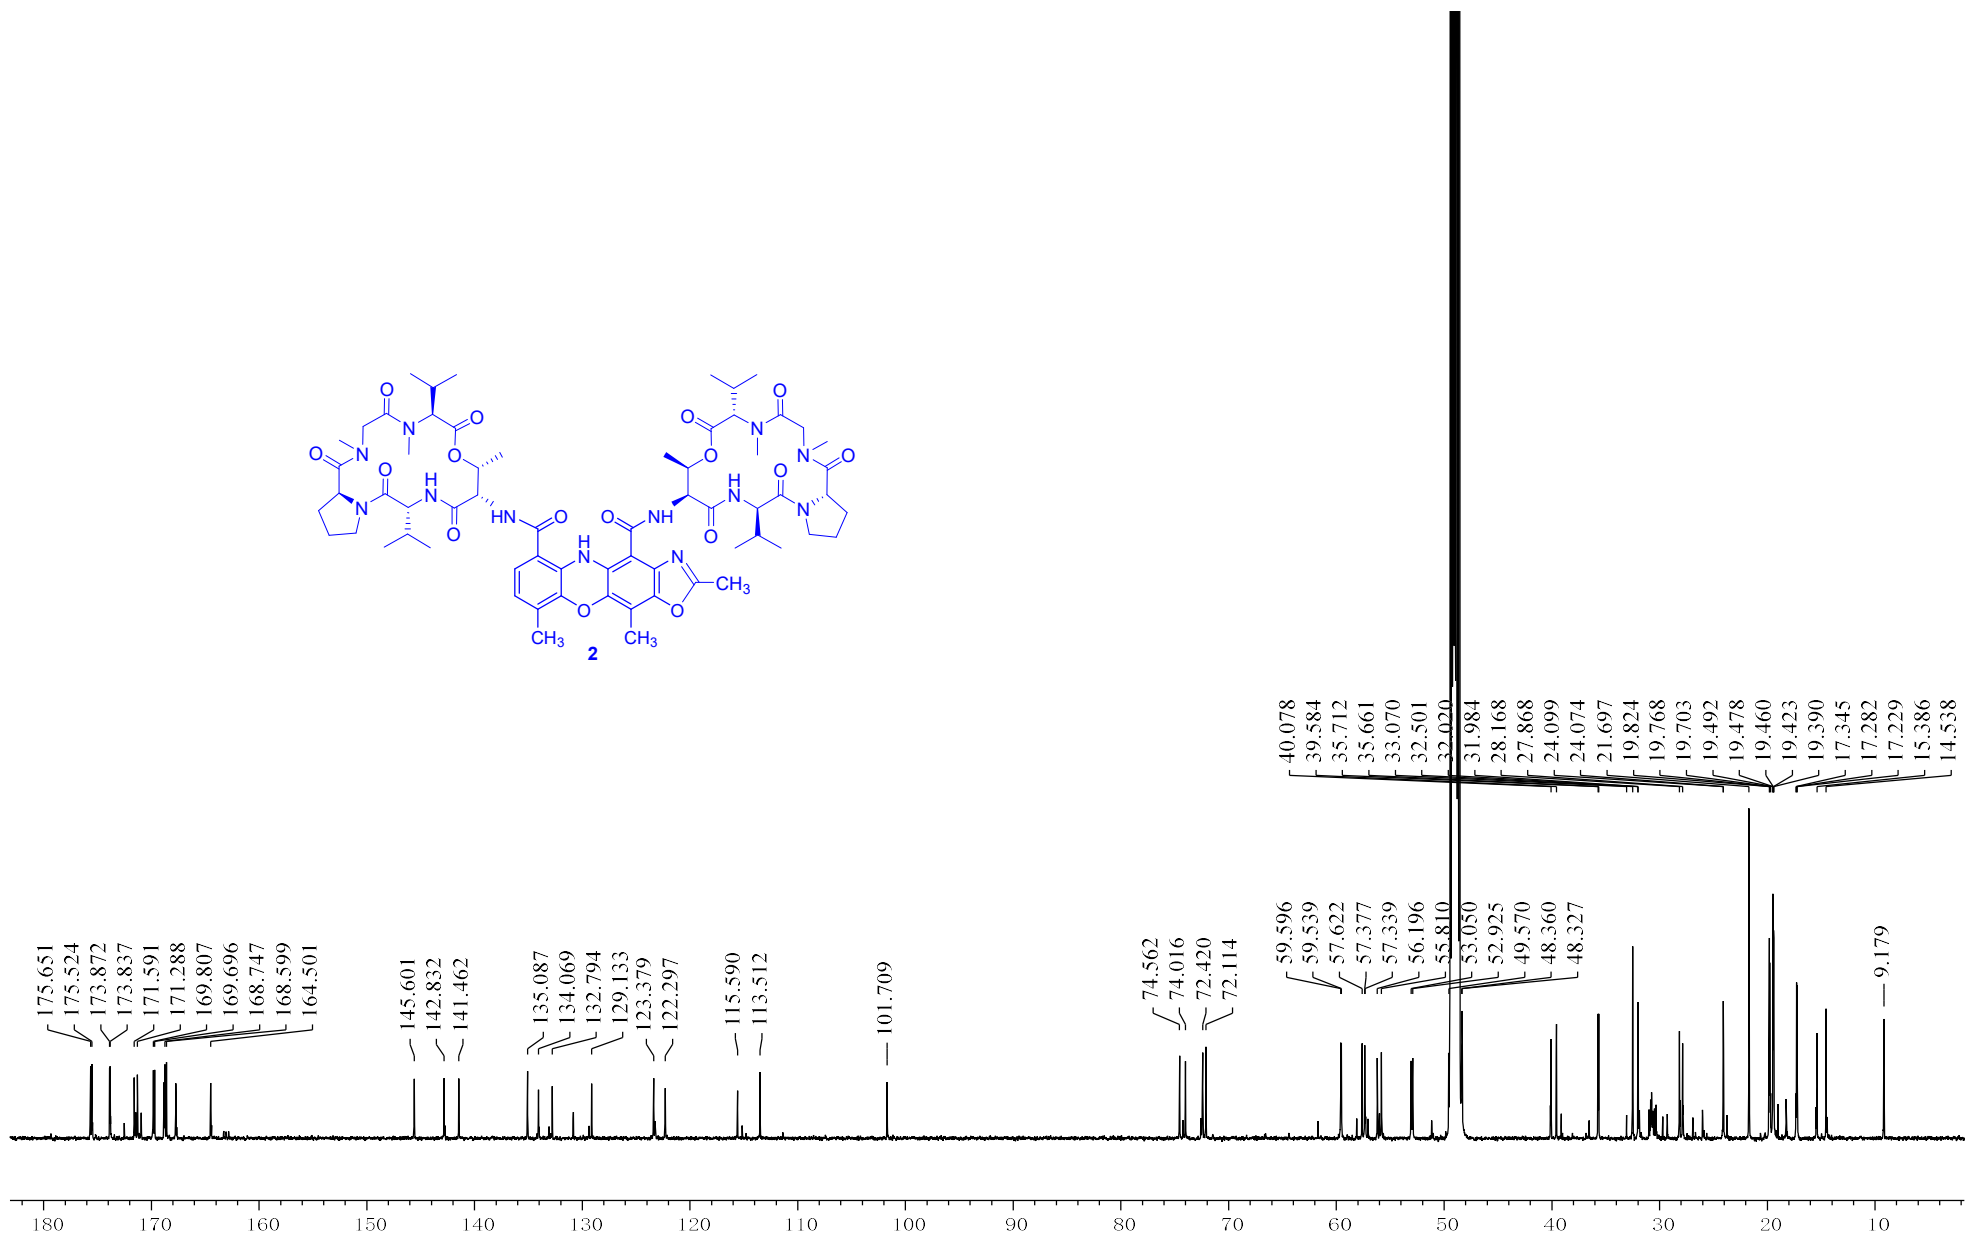

Figure S22. The <sup>13</sup>C NMR spectrum of neo-actinomycin B (2) in MeOH-*d*<sub>4</sub> (150 MHz).

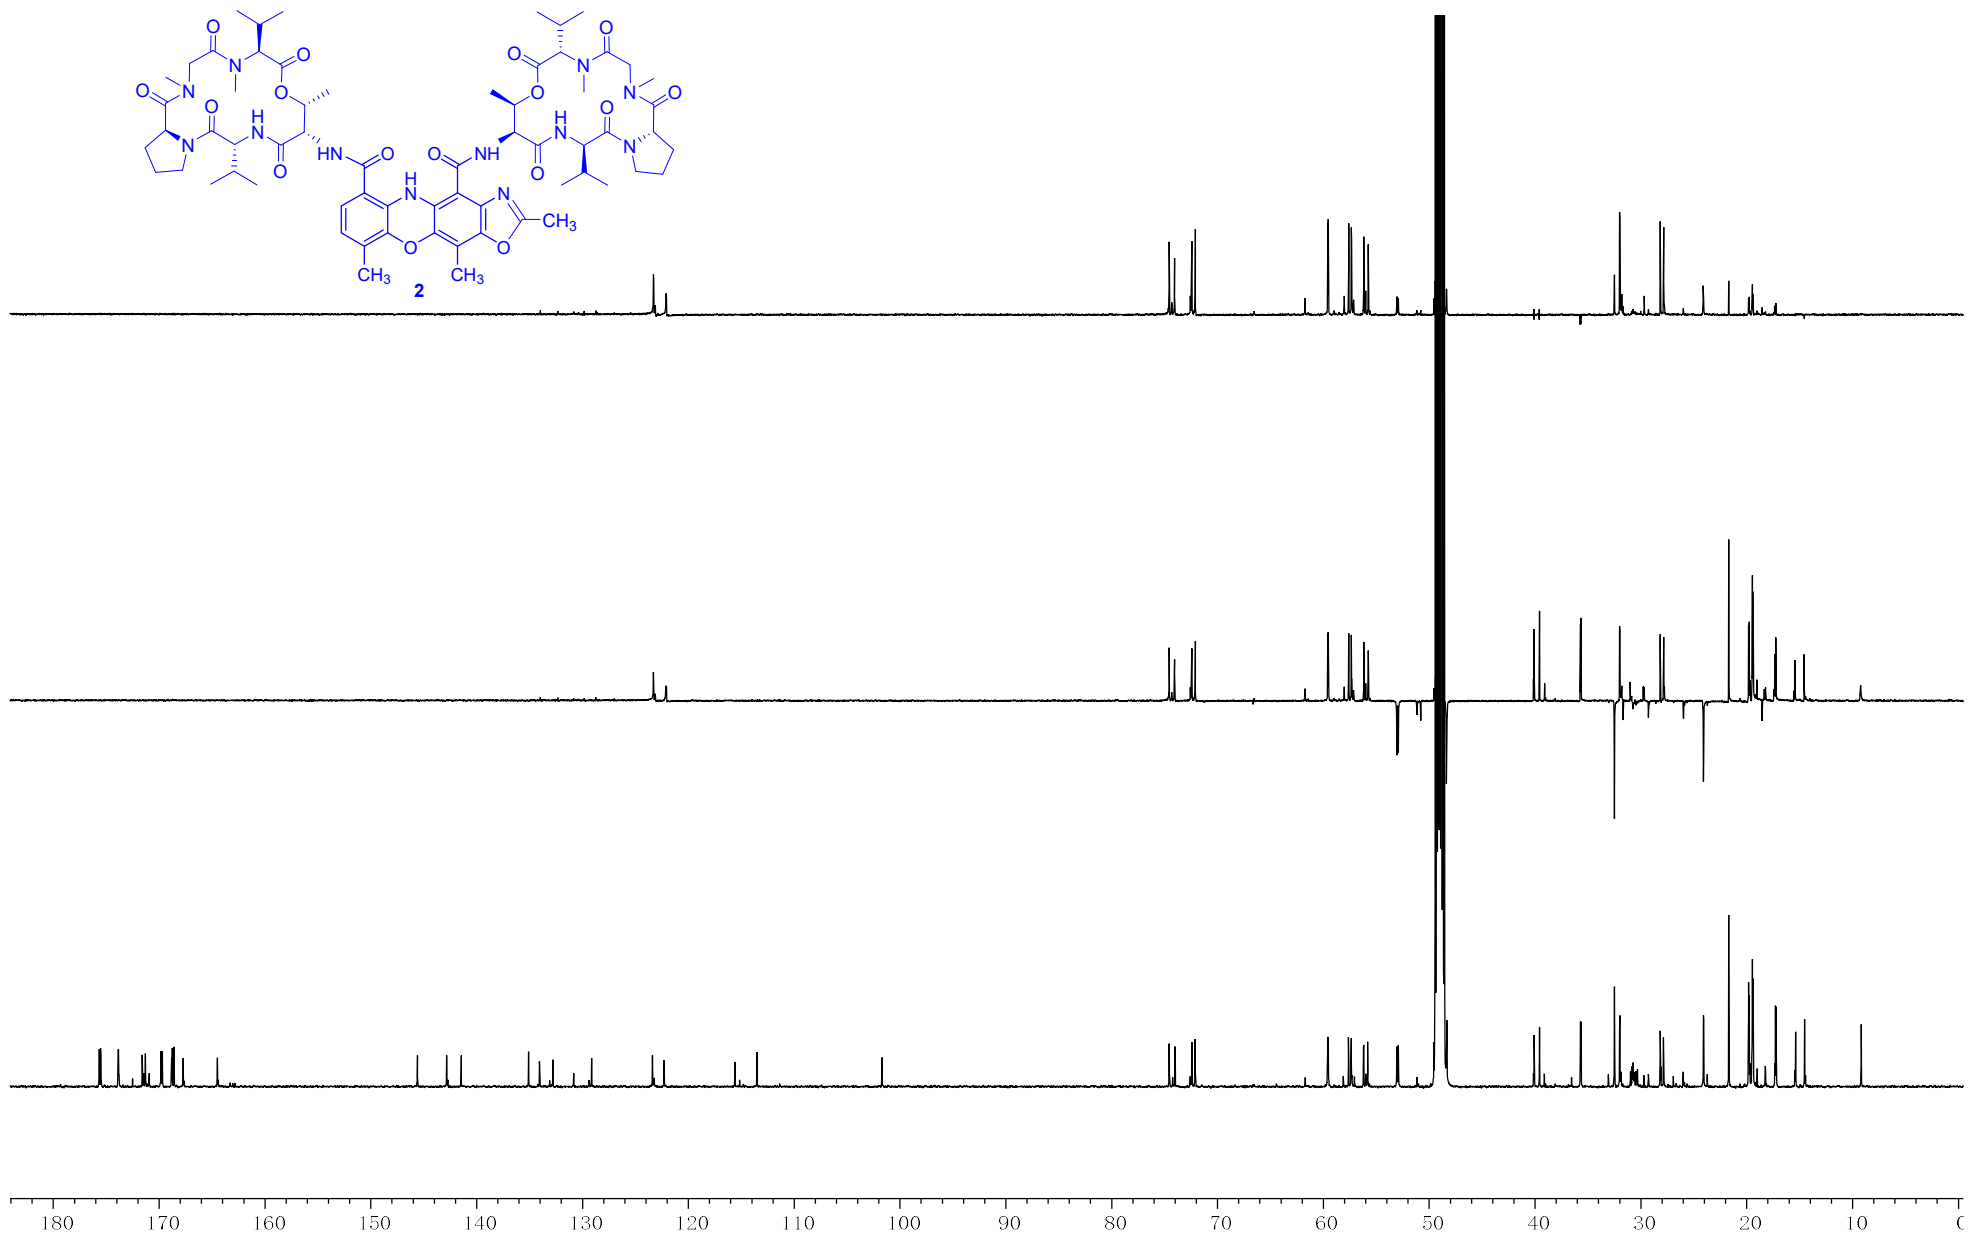

**Figure S23.** The DEPT spectrum of neo-actinomycin B (**2**) in MeOH-*d*<sub>4</sub> (150 MHz).

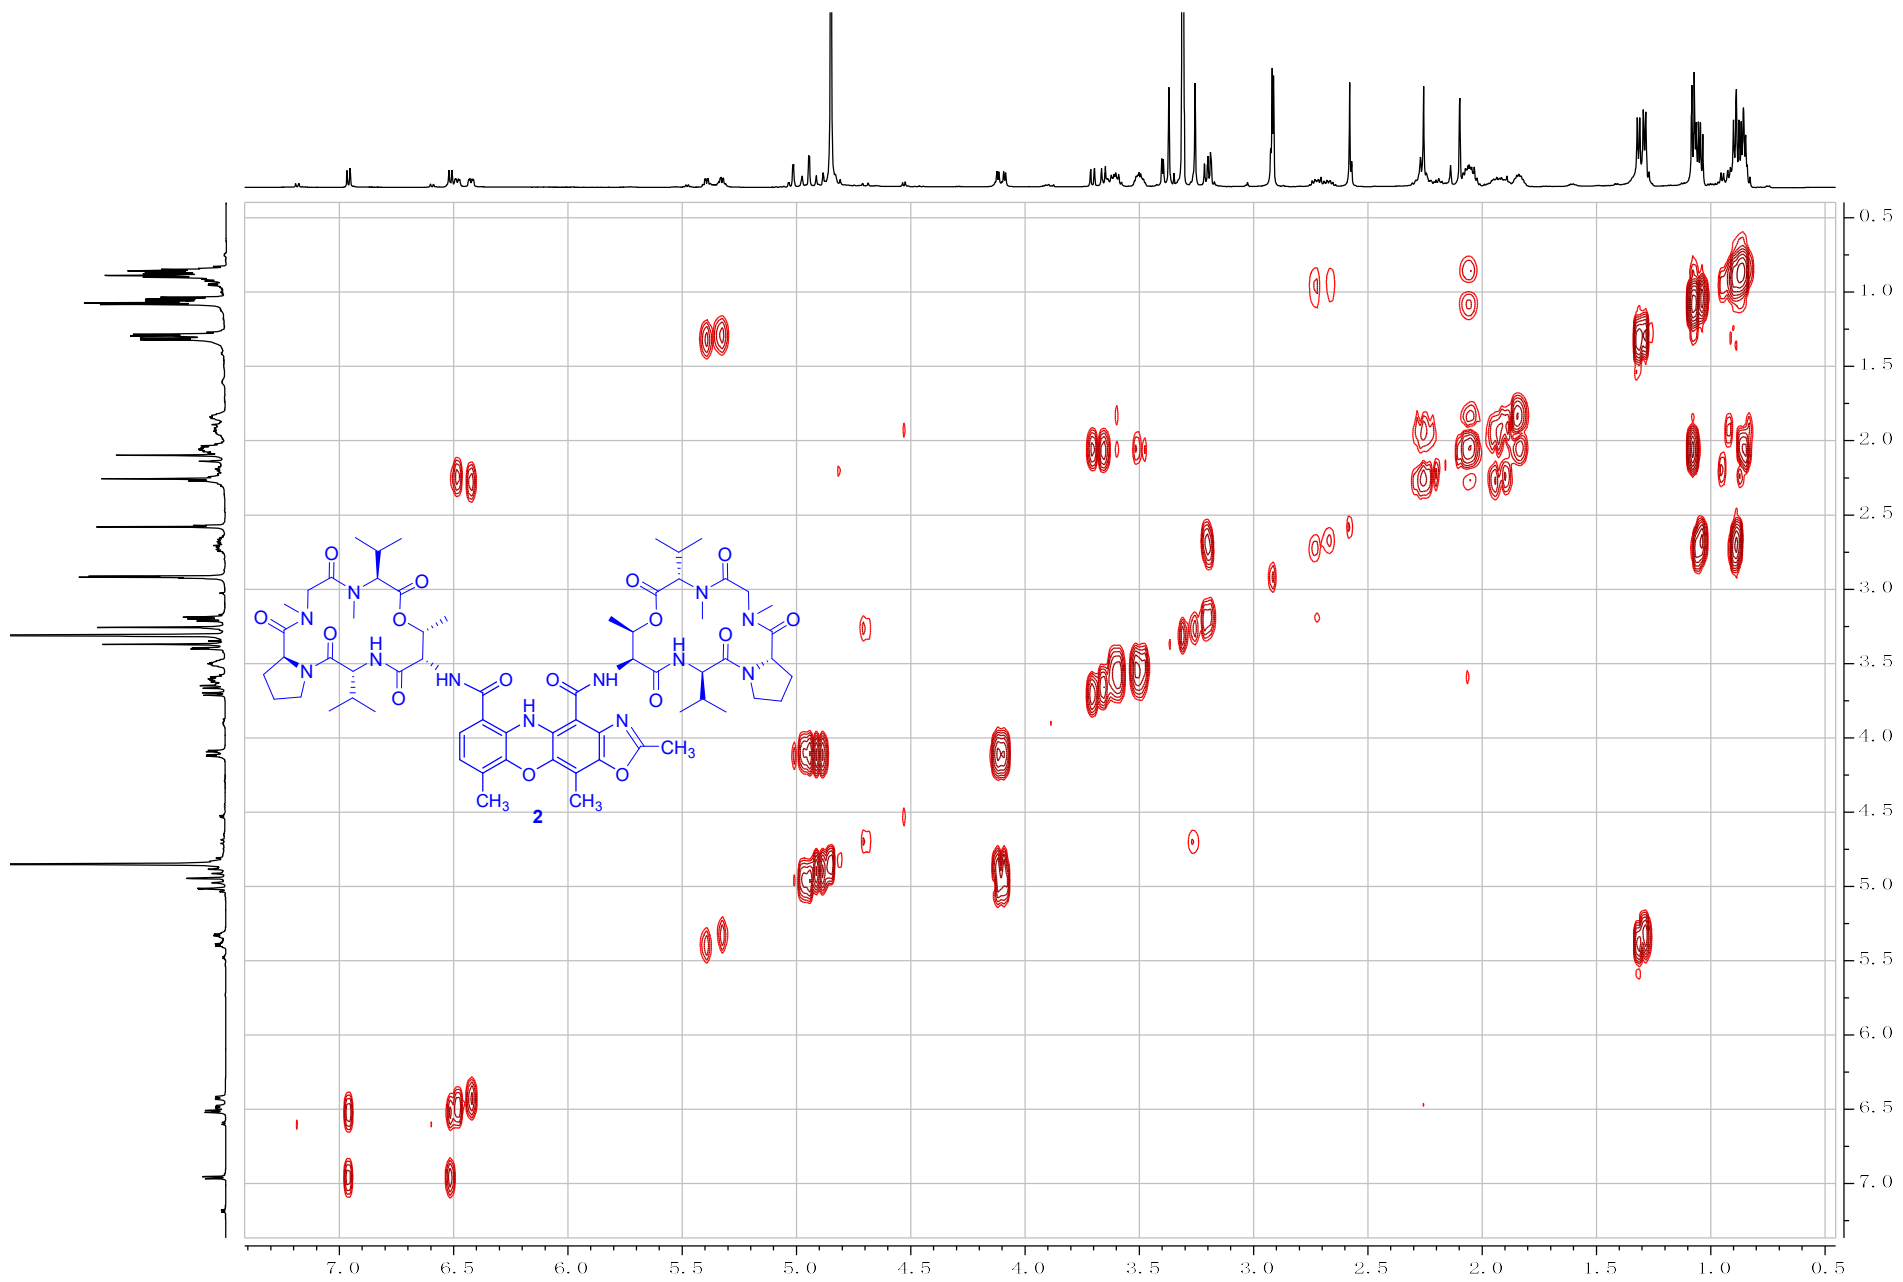

**Figure S24.** The COSY spectrum of neo-actinomycin B (**2**) in MeOH-*d*<sub>4</sub> (600 MHz).

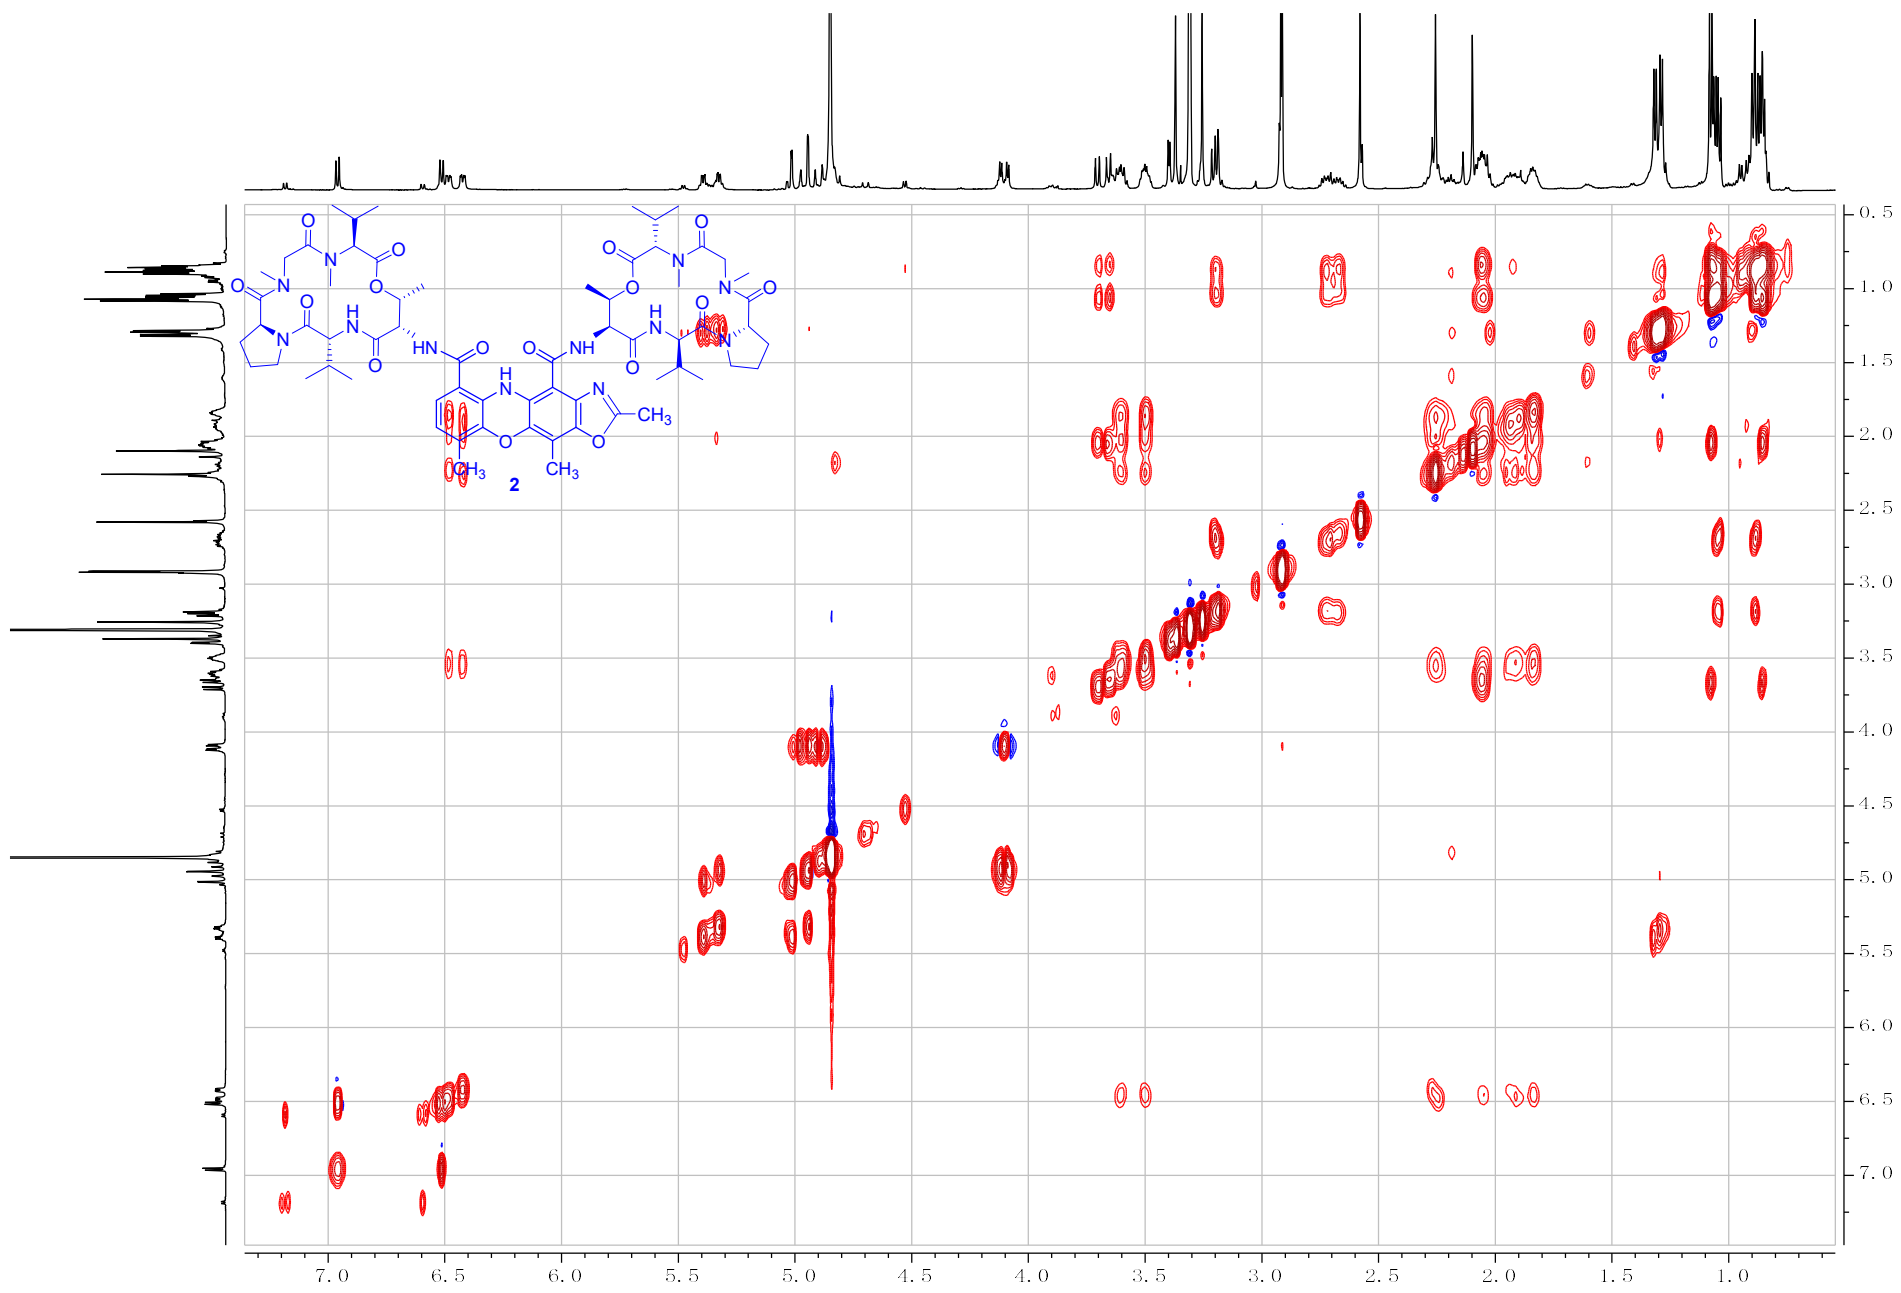

Figure S25. The TOCSY spectrum of neo-actinomycin B (2) in MeOH-d<sub>4</sub> (600 MHz).

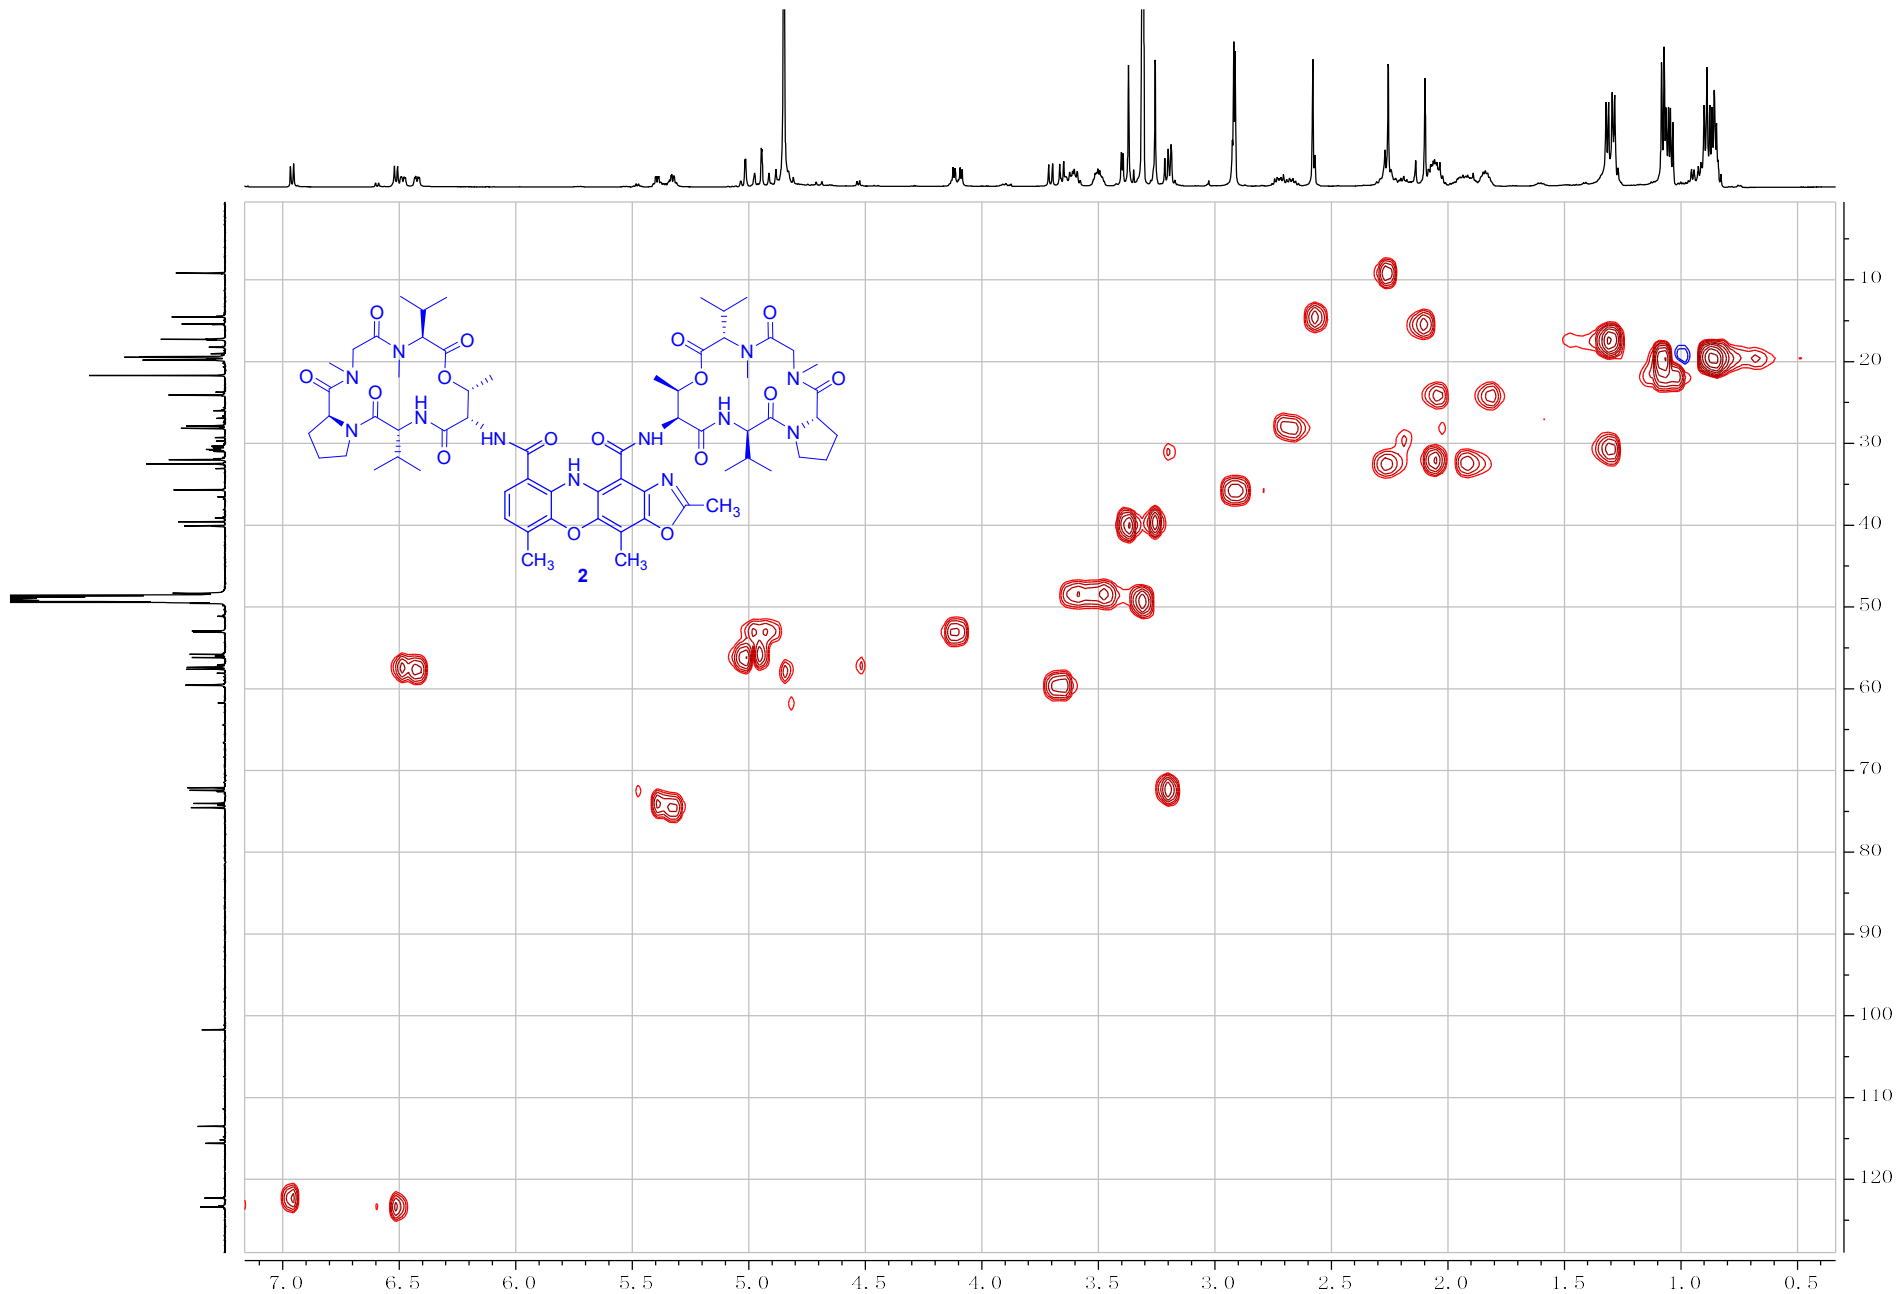

Figure S26. The HSQC spectrum of neo-actinomycin B (2) in MeOH-*d*<sub>4</sub> (600 MHz).

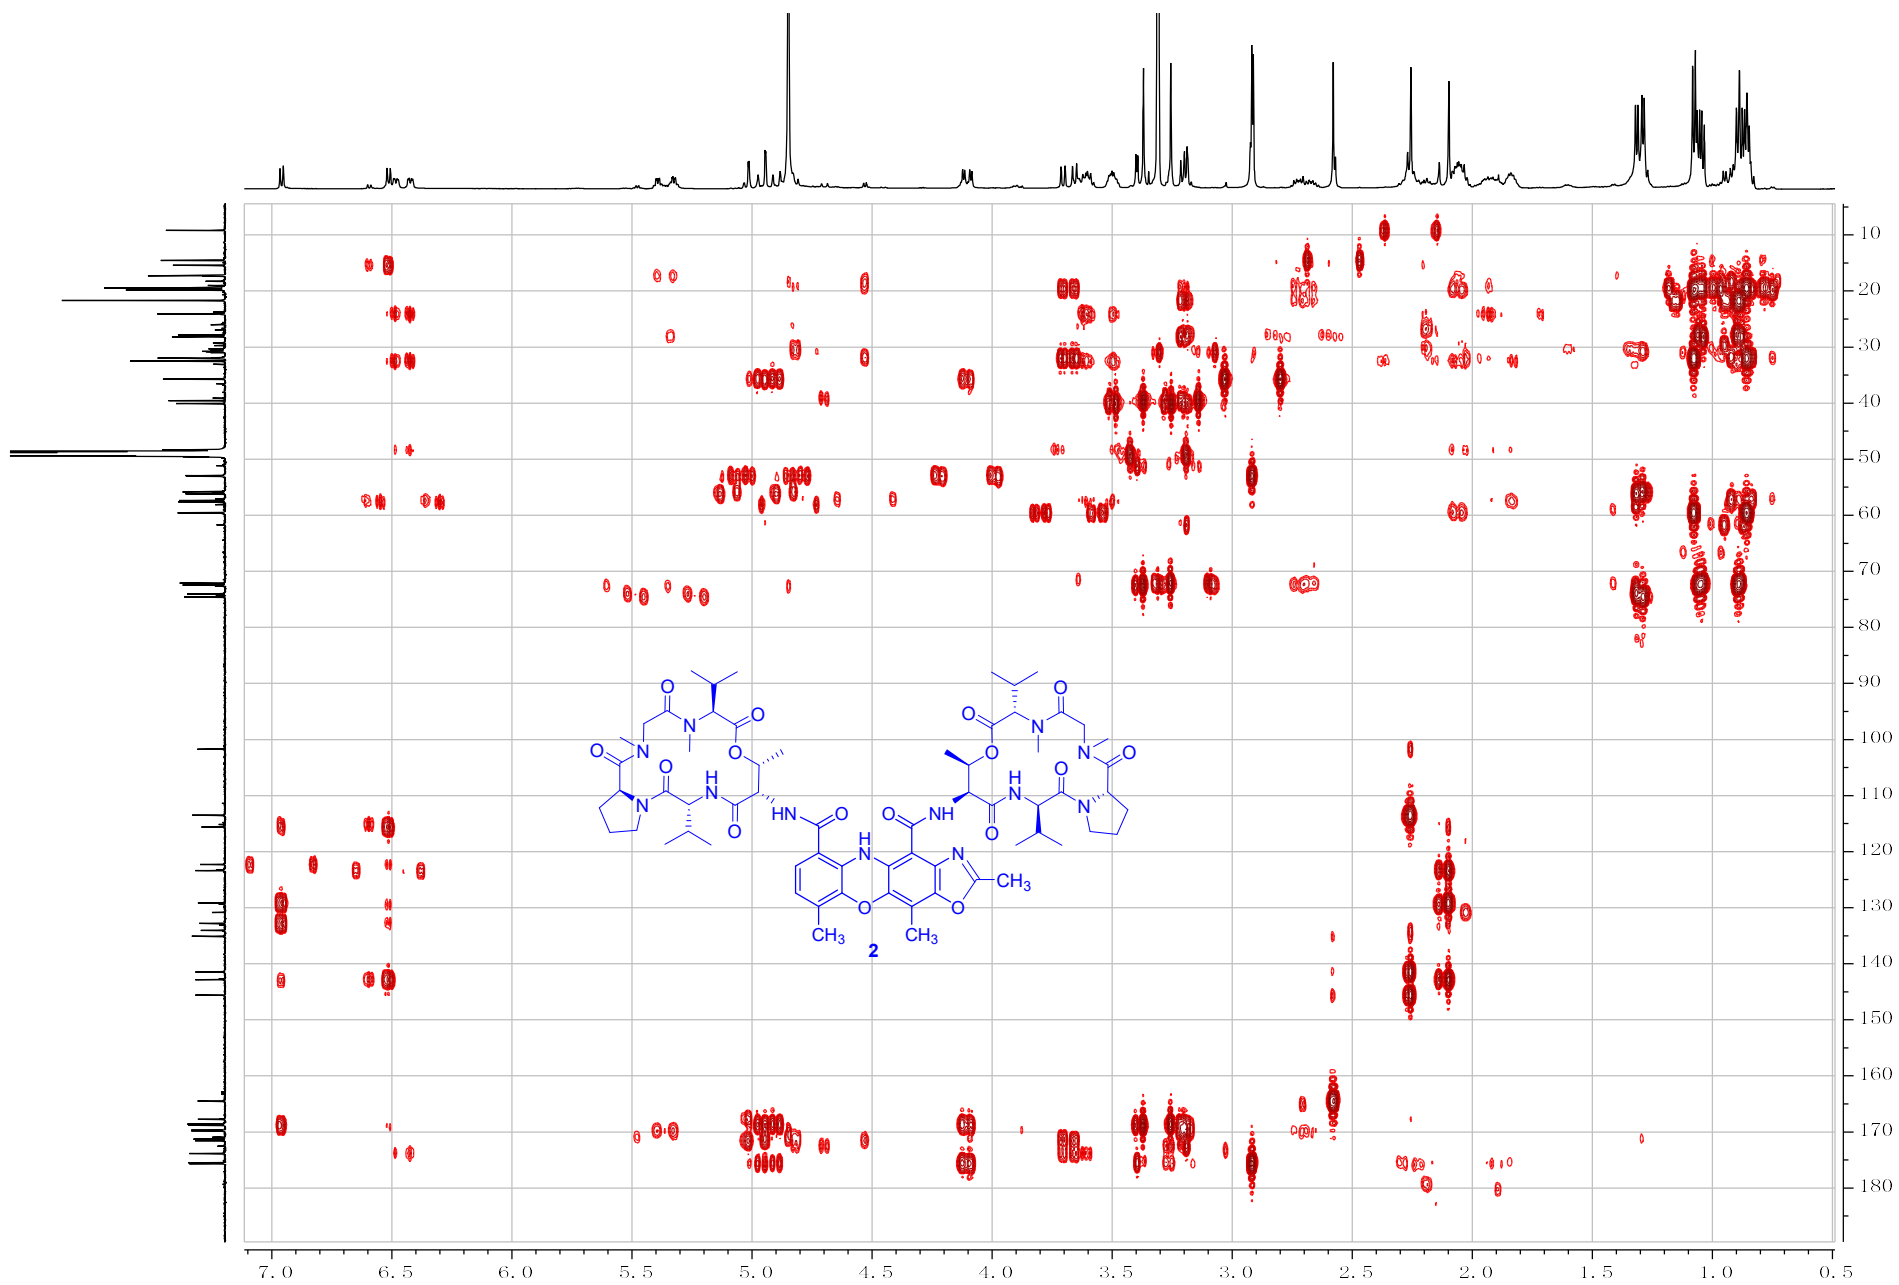

Figure S27. The HMBC spectrum of neo-actinomycin B (2) in MeOH-*d*<sub>4</sub> (600 MHz).

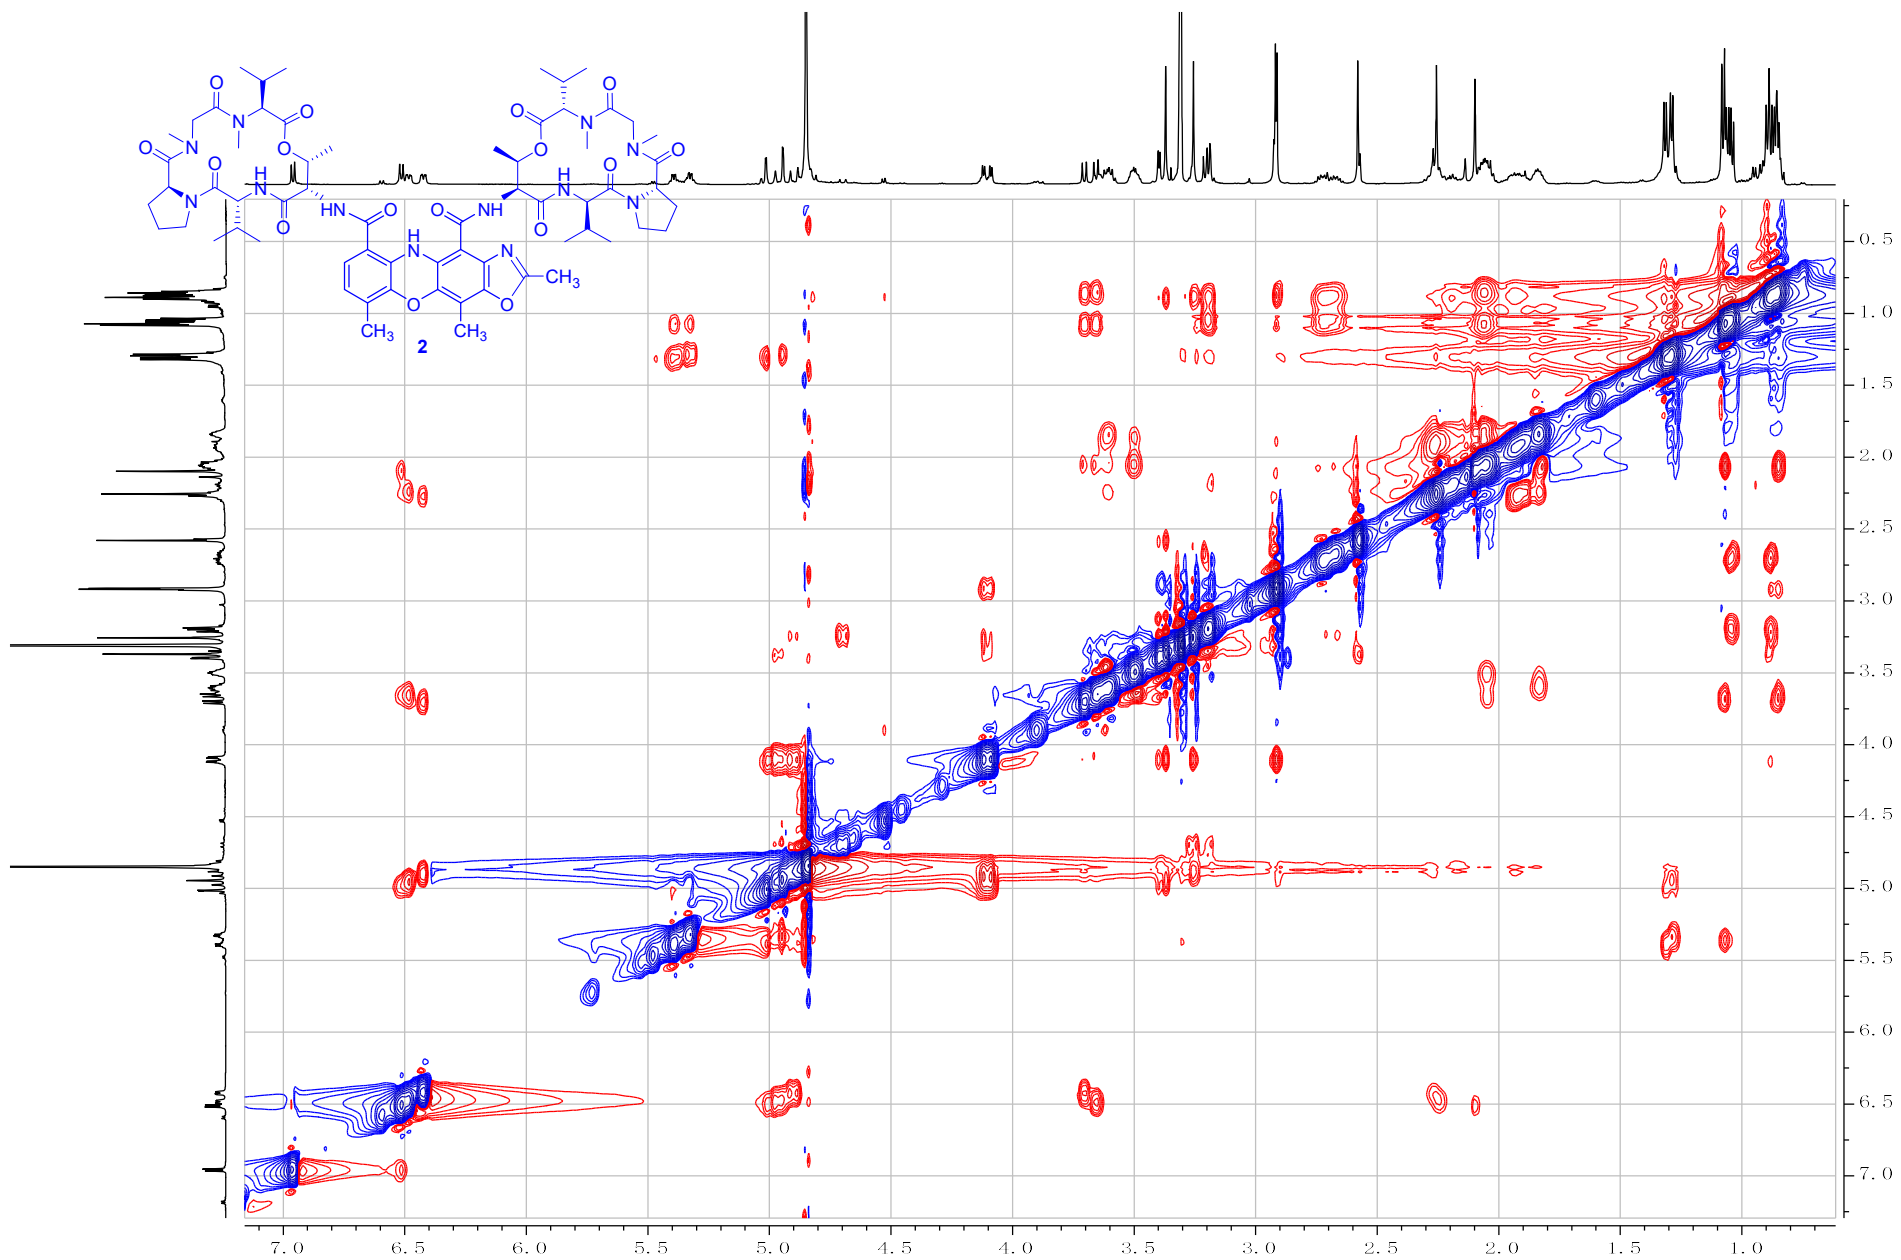

Figure S28. The ROESY spectrum of neo-actinomycin B (2) in MeOH-d<sub>4</sub> (600 MHz).
